1 **Title:**

2

3 The small GTPase Rab11F represents a molecular marker within the secretory  
4 pathway required for the nitrogen-fixing symbiosis

5

6 Prachumporn Nounurai<sup>1</sup>, Holger Densow<sup>2&</sup>, Hanna Bednarz<sup>2&</sup>, Karsten Niehaus<sup>2\*</sup>

7

8

9 <sup>1</sup>Department of innovative plant biotechnology and precision agriculture research,  
10 National Center for Genetic Engineering and Biotechnology (BIOTEC),  
11 Thailand Science Park, Phaholyothin Road, Khlong 1, Khlong Luang  
12 Pathumthani, 12120, Thailand

13

14 <sup>2</sup> Department of Proteome and Metabolome Research, Faculty of Biology & CeBiTec,  
15 Bielefeld University, Universitätsstr. 25, 33615 Bielefeld ,Germany

16

17 \* corresponding author

18 [kniehaus@CeBiTec.Uni-Bielefeld.de](mailto:kniehaus@CeBiTec.Uni-Bielefeld.de)

19 Tel.: ++49(0)521 106 5631

20 FAX ++49(0)521 106 5626

21

22

23

## 24 **Abstract**

25 The nitrogen-fixing root nodule is generally derived through a successful symbiotic  
26 interaction between legume plants and bacteria of the genus *Rhizobium*. A root nodule  
27 shelter hundreds of *Rhizobia*, which are thought to invade into the plant cells through  
28 an endocytosis-like process despite the existence of turgor pressure. Each invading  
29 *Rhizobium* is surrounded by the peribacteroid membrane to form the symbiosome,  
30 which results in the higher acquisition of host membrane materials. In this study, we  
31 show the localization of Rab11F, a RabA6b homolog with the large Rab-GTPase  
32 family, which was highly expressed in root nodules of *Medicago sativa* and *M.*  
33 *truncatula*. Rab11F-labeled organelles accumulated the membrane specific dye FM4-  
34 64 and were sensitive to Brefeldin A by forming aggregates after treatment with this  
35 drug. By co-localization with the cis-Golgi marker, GmMan1-mCherry, Rab11F-  
36 organelles formed tri-colored organelles, whereby Rab11F was located to the opposite  
37 side of GmMan1-mCherry indicating that Rab11F-labeled structures were localized  
38 within the trans-Golgi network (TGN). In root nodules, Rab11F was localized  
39 transiently at the infection thread-covering membrane on the side of infection droplets  
40 and the peribacteroid membranes. The symbiosome acquires Rab11F during the entry  
41 process and differentiation. However, the symbiosome did not recruit Rab11F after  
42 cessation of division. In conclusion, the *legume* plant seemed to use a specialized  
43 secretion pathway from the TGN, which was marked by Rab11F, to proliferate the  
44 symbiosome membrane.

45

46

47 **Keywords:** *Sinorhizobium meliloti*, *Medicago truncatula*, symbiosome membrane,

48 Rab GTPase, endocytosis, Trans Golgi Network, Root Nodules, Rab11

## 49 **Introduction**

50

51 Legume plants are able to live in symbiosis with *Rhizobium* bacteria resulting in the  
52 formation of specialized nitrogen-fixing root organs, termed root nodules. The onset  
53 of nodule development is triggered by the molecular signal exchange between the  
54 plant and the bacteria in which the bacterium produces lipochito-oligosaccharides,  
55 Nod factors, in response to the flavonoids secreted by the plant(1). In Turn, the Nod  
56 factor induces cellular responses in root hair cells and the reactivation of the cell cycle  
57 in the root cortex and the pericycle, leading to root hair curling and the formation of  
58 polarized cytoplasmic bridges (pre-infection threads) and a nodule primordium in the  
59 inner cortex (2,3).

60

61 Following a series of recognition stages, the bacteria become entrapped in the center  
62 of a root hair curl known as the hyaline spot, from which the bacteria enter the root  
63 via a tube-like structure termed infection thread. The infection thread is initiated by  
64 the invagination of the plant cell wall in the curl and by the degradation of the cell  
65 wall followed by the cell membrane invagination and the deposition of cell wall  
66 material around the distal end of the invagination. The lumen of the infection thread is  
67 topologically equivalent to the apoplastic, or the intercellular, space and is bordered  
68 by the infection thread wall and the membrane(2). It is filled with bacteria and a  
69 specific extracellular matrix of plant and microbial origin(4). When the infection  
70 thread reaches the nodule primordium, the bacteria are released into the host cell  
71 cytoplasm producing infection droplets, formed from the non-walled outgrowths of  
72 the infection thread. At the periphery of the droplet, the infection thread membrane

73 adjacent to the bacterium invaginates and is subsequently pinched off, resulting in the  
74 deposition in the cytoplasm of a single bacterium surrounded by a lipid bilayer  
75 membrane, which is now termed bacteroid or symbiosome membrane(2). This  
76 process seems to be comparable to phagocytosis in animal cells.

77

78 The detailed mechanism of the endocytic process in plants has not been completely  
79 elucidated. In general, endosome-engulfed cargos are delivered to lytic vesicles via a  
80 series of endocytic compartments, beginning with the early endosome and then the  
81 late endosome, before finally being deposited in the lysosome in animals or the  
82 vacuole in plants(5,6). These changes in organelle characteristics can be identified by  
83 the presence of organelle-specific markers, viz. membrane receptors, enzymes, and  
84 small G-proteins, including Rab proteins(7). Rabs are small GTPases, which function  
85 as regulators of a variety of intracellular vesicle trafficking processes, such as  
86 endocytosis, exocytosis, and membrane recycling(8). Each Rab protein is located on a  
87 different intracellular membrane compartment. Thus, they can be used as organelle-  
88 specific markers. In animal cells, the compartment containing freshly engulfed  
89 bacteria is referred to as the early phagosome and contains the marker Rab5;  
90 subsequently, the phagosome recruits Rab7, a marker of the late endosome(9), which  
91 occurs by the removal of Rab5 with concomitant replacement by Rab7 (Rab  
92 conversion) (10,11).

93

94 In plants, symbiosomes do not acquire Rab5 at the early phagosome stage, although  
95 they recruit Rab7 when they stop dividing(12), suggesting that the symbiosome enters  
96 the host cytosol through a Rab5-independent endocytic pathway. However,  
97 localization of plant Rab5 homologs, namely Ara6/RabF1, Ara7/RabF2b, and

98 Rha1/RabF2a is on multivesicular bodies (MVBs) or pre-vacuolar compartments,  
99 which are considered to be late endosomes(12–15). This suggests that symbiosomes  
100 are possibly formed by another uncharacterized endosomal compartment in plants.

101

102 There have been reports indicating that in plants, the trans-Golgi network (TGN) is  
103 involved in the formation of early endosomes(15–17). In *Arabidopsis*, VHA-a1-  
104 antibodies label organelles identified as TGNs, which rapidly internalize the  
105 endocytic tracer FM4-64 indicating that TGN and the early endosome (EE) are  
106 subdomains of the same compartment(16). In tobacco BY-2 cells, SCAMP1-labeled  
107 organelles are also TGN and absorb FM4-64 before the formation of the multi-  
108 vesicular body (MVB)/ the prevacuolar compartment (PVC)(15). In *Arabidopsis*,  
109 Rab-A2/A3 is localized to the organelles sensitive to the fungal toxin Brefeldin A,  
110 which accumulate FM4-64 in the vicinity of the prevacuolar compartment(17). The  
111 TGN is also involved in the formation of the cell plate during cell division, which is  
112 of special interest since the endocytosis of apoplastic material is also involved in the  
113 cell plate formation(18). In animals and yeast, the TGN acts as a recycling  
114 compartment in which Rab11 proteins are involved in membrane trafficking between  
115 the endosome, the TGN, and the plasma membrane(19,20). In polarized cells, the  
116 TGN also acts as the main sorting hub for directing secretory vesicles to the  
117 appropriate surface membrane destination (apical or basolateral)(21), a process  
118 regulated by Rab11(22). Therefore, the TGN has been proposed to be a specialized  
119 organelle with different subdomains responsible for directing vesicles to the lysosome  
120 for catabolism or to the plasma membrane for secretion(15).

121

122 Several studies have shown that plant Rab11 is associated with the secretory pathway  
123 from the TGN to the plasma membrane. In *Arabidopsis*, Rab11 or the RabA clade is  
124 the largest family among Rab families and has 26 members. There is certain evidence  
125 indicating that some members of the Rab11 family are involved in the symbiosis. In  
126 the symbiosis-defective mutant *dnf1* of *M. truncatula*, defective in a subunit of signal  
127 peptidase complex, the bacteroid and symbiosome development are blocked. The  
128 microarray analysis of *M. truncatula* gene expression atlas showed the expression of  
129 Rab11B highly correlated to the gene expression of DNF1(23). In the common bean  
130 (*Phaseolus vulgaris*), RabA2 RNA interference (RNAi) expressing plants failed to  
131 induce root hair deformation and the initiation of infection threads(24). Whitehead  
132 and Day (1997) already provided evidence for the origin of the symbiosome  
133 membrane. However, the molecular mechanism that determines membrane identity in  
134 this process remains unknown(25). Since small GTP-binding proteins are associated  
135 with specific membranes, these proteins can be used to distinguish between the  
136 otherwise microscopically identical vesicles. For this reason, these proteins are ideal  
137 tools for analyzing the origin of the symbiosome membrane.

138

139 In this study, the role of MsRab11F (Rab11F) in the symbiosome formation in *M.*  
140 *truncatula* nodules was investigated. Rab11F is highly expressed in *Medicago sativa*  
141 root nodules, which is consistent with the high proliferation of the symbiosome  
142 membrane, suggesting the involvement of Rab11F in this process(26). We show that  
143 Rab11F is transiently localized to the infection thread and the peribacteroid  
144 membranes, indicating that symbiosomes can recruit Rab11F immediately following  
145 the endocytic uptake process and during their development within the host plant.

146

## 147 **Materials and methods**

### 148 **Construction of MsRab11f1-mGFP6 fusion protein**

149

150 Msrab11f1 (Rab11F; accession number: AJ697970) was amplified by PCR from  
151 pFlag-Mac-Rab11F(26) using primers extended with BamHI and SacI restriction sites  
152 (GGATCCATGGA-TCATGATGCAATTA, and GAGCTCTCATGAACAACAAGG  
153 AGCC) and was subcloned into pGemT-easy (Promega). The subcloned amplicon  
154 was digested with BamHI and SacI and ligated to the BamHI-SacI digested  
155 expression vector pET24a(+)(Novagen). The mgfp6 was amplified by PCR from  
156 p35S-mGFP6 using primers extended with BamHI restriction sites  
157 (GGATCCATGCATAAAGGAGAAGAAGCTTTTCACTGG, and GGATCCTCACC  
158 CATCCTTTTTGTATAGTTCATCCAT) and subcloned into BamHI-digested  
159 pGemT-easy. As the C-terminal of Rab11F is needed for isoprenylation, which is  
160 essential for the attachment to the membranes(26), mGFP6 thus was fused to the N-  
161 terminus of Rab11F. The fusion gene was expressed under the control of the 35S  
162 promoter. The subcloned amplicon was digested with BamHI and inserted into the  
163 BamHI digested pET24-MsRab11f1 resulting in the pET24-mGFP6:MsRab11f1  
164 expression vector, which was transfected into the *E. coli* strain BL21(DE3) and  
165 transformants were selected on LB medium plates containing the appropriate drug  
166 selection marker. In addition, positive colonies were identified by the presence of  
167 green fluorescence under UV-light.

168 To generate the vector for the transient transformation, we isolated the insert from the  
169 pET24-mGFP6:MsRab11f1 vector by digestion with XbaI and SacI and ligated into

170 XbaI-SacI digested with p35S-EGFP (Clontech), thereby removing the wild type  
171 GFP.

172 To generate a construct for stable transformation, we amplified a sequence of  
173 MsRab11F-mGFP6 with the 35S promoter and NOS terminator coding sequences by  
174 PCR and subcloned into pGemT-easy. The amplicon was digested with HindIII and  
175 ligated into the HindIII digested binary vector pBIN19. The Msrab11f1(S29N) mutant  
176 was generated using QuikChange II Site-Directed Mutagenesis Kits performed  
177 according to the manufacturer's manual (Stratagene) with the primers  
178 CTGGAGTTGGGAAAAACAATCTGCTTTCAAGG, and CCTTGAAAGCAGATT  
179 GTTTTTCCCAACTCCAG. The resulting binary vector was introduced into the  
180 *Agrobacterium rhizogenes* strain ARqual and the *Agrobacterium tumefaciens* strain  
181 GV3101:pMP90 by electroporation followed by the selection on YEP medium  
182 containing the appropriate antibiotics.

183 A 35S–soybean mannosidase I–red fluorescent protein (Gm-ManI-mCherry) construct  
184 was kindly provided by Dr. A. Staehelin and A. Nebenfuhr (University of Colorado,  
185 Boulder CO, USA)(27).

186

### 187 ***Medicago truncatula* growth, transformation, and nodulation**

188

189 *M. truncatula* cv. Jemalong seed surfaces were sterilized by incubating with 37% HCl  
190 for 10 min. After washing 5 times with sterile water, the seeds were dried in a laminar  
191 flow hood, after that germinated and grown on nitrogen-free agar (Agar No.1 Oxoid)  
192 containing Hoagland solution. The seedlings were transformed by using  
193 *Agrobacterium rhizogenes* ARqual to generate transgenic roots.



194 For the nodulation experiments, *M. truncatula* cv. Jemalong with transgenic roots  
195 were transferred from agar to vermiculite (16/8 hr photoperiod at 22°C and 60%  
196 humidity) and fertilized weekly with a nitrogen-free nodulation solution for two  
197 weeks. Wild type plants were grown on nitrogen-free agar containing a nodulation  
198 solution and were inoculated directly without nitrogen-starvation. All plants were  
199 inoculated with the *S. meliloti* strain Sm2011-mRFP1 expressing a red fluorescent  
200 protein, and the nodules were harvested 2-4 weeks after inoculation.

201

## 202 **Transient expression in *Nicotiana benthamiana***

203

204 *N. benthamiana* was grown in a plant growth chamber at 21°C, with a 14 hr light  
205 exposure, and a 10 hr dark period for 5-6 weeks. Transient transformation of tobacco  
206 leaf epidermal cells was performed with the leaf infiltration method using the *A.*  
207 *tumefaciens* strain GV3101:pMP90 at OD<sub>600</sub> value of 0.05.

208

## 209 **Protoplast transformation**

210

211 Protoplasts were isolated from *N. tabacum* BY-2 suspension cells grown at 24 °C  
212 with shaking (130 rpm) in a medium containing Murashige and Skoog salts  
213 supplemented with 30 g/L sucrose, 100 mg/L myoinositol, 255 mg/L KH<sub>2</sub>PO<sub>4</sub>, 1  
214 mg/L thiamin-HCl, 0,2 mg/L 2,4-dichlorophenoxyacetic acid, at a pH of 5,8 and  
215 subcultured once a week. A 20 ml aliquot of a three-day-old suspension culture was  
216 centrifuged at 400 g at room temperature for 5 min and the pellet was washed with a  
217 wash-solution (0,5%(w/v) Bovine serum albumin (BSA), 0,01%(w/v), 2-

218 mercaptoethanol, 50 mM CaCl<sub>2</sub>, 10 mM Na-acetate, 0,25 M mannitol, pH 5,8) and  
219 resuspended in an isolation-solution (wash-solution containing 1% cellulose R10  
220 (Onozuka) and 0.5% macerozyme (Duchefa), pH 5.8.) and incubated at 26 °C  
221 overnight. Then, the cell suspension was centrifuged at 100 g at room temperature for  
222 5 min, and the pellet washed once with the wash solution. The pellet was then washed  
223 again with 10 ml of w5-solution (154 mM NaCl, 125 mM CaCl<sub>2</sub>, 5 mM KCl, 5 mM  
224 glucose, pH 5,8-6,0) and resuspended in 5 ml of w5-solution and incubated in the  
225 dark at 4°C. The supernatant was removed, and the protoplasts were washed once  
226 with MMM-solution (15 mM MgCl<sub>2</sub>, 0,1% (w/v) MES, 0,5 M Mannitol, pH 5,8). The  
227 protoplasts were adjusted to 2 × 10<sup>6</sup> cells/ml in MMM solution before adding ~30 µg  
228 of each plasmid DNA to 300 µl of the protoplast suspension followed by the addition  
229 of 300 µl of PEG solution (40% (w/v) PEG 4000 (Fluka), 0.4 M mannitol, 0,1 M  
230 CaCl<sub>2</sub>, pH 8-9) and incubated at room temperature for 10-20 min. The protoplasts  
231 were washed with w5-solution, centrifuged at 100 g for 5 min., and resuspended in  
232 700 µl of cell culture medium containing 0,4 M sucrose. The protoplasts were then  
233 incubated in the dark for 16 hr at 26 °C.

234

### 235 **Immuno-localization**

236

237 Semi-thin sections (60 µm) of nodule tissues were prepared using a Leica VT1000S  
238 vibratome (Leica, Wetzlar, Germany) and the sections fixed for 2 h in 4%  
239 formaldehyde in PME buffer (50 mM PIPES, 5 mM MgSO<sub>4</sub>, and 10 mM EGTA, pH  
240 7.0). Then the sections were washed thrice for 10 min with PME buffer and incubated  
241 for 1 h in a blocking solution (2% (w/v) bovine serum albumin (BSA) in PBS buffer  
242 pH 7.4). Nodule sections were incubated with rabbit anti-Rab11f1 antibodies (dilution

243 1:20 in PBS pH 7.4 containing 0.5% (w/v) BSA) overnight at 4 °C. The samples then  
244 were rinsed three times for 10 min each with PBS and incubated with secondary goat  
245 anti-rabbit IgG Alexa Fluor 647 (Molecular Probes) (dilution of 1:50 in 0.5% (w/v)  
246 BSA in PBS) for 2 h. Nodule sections were washed thrice for 10 min each with PBS  
247 and observed under a confocal laser scanning microscope. As a negative control, thin  
248 sections of root nodules were incubated only with primary anti-Rab11F or with  
249 antirabbit antibodies.

250

## 251 **Fluorescence dye, BFA treatment, and microscopy**

252

253 For BFA treatment, the transgenic tobacco leaves were incubated in 50  $\mu$ M BFA  
254 diluted from a 50 mM stock in DMSO and then mounted on slides in the presence of  
255 BFA. The transgenic *M. truncatula* roots were inoculated with 5  $\mu$  of FM4-64  
256 (Invitrogen, Molecular Probes) diluted from 5 mM stock in water to stain the  
257 endocytic organelles. Plant tissues and cells were observed under a confocal laser  
258 scanning microscope (Leica TCS SPE: Heidelberg, Germany) using a 63 $\times$ oil-  
259 immersion objective. CLSM images were obtained using excitation/emission  
260 wavelengths at 488/500-530 nm for mGFP6, 532/ 570-620 nm for mRFP1/ Fm4-64,  
261 and 635/650-700 nm for Alexa flour 647. Images were processed using the Leica  
262 Application Suite Advanced Fluorescence (LAS AF) software.

263

264

265

266

267

## 268 **Results**

269

### 270 **Localization of Rab11F in *M. truncatula* root**

271

272 To study the role of Rab11F in symbiosome formation, we constructed a recombinant  
273 plasmid expressing a fusion protein of Rab11F and mGFP6. The construct was  
274 transfected into the *M. truncatula* root using the hairy root method(28), and the  
275 expression was observed using a confocal laser scanning microscope (CLSM). *M.*  
276 *truncatula* roots expressing GFP-Rab11F exhibited motile GFP labeled structures of  
277 uniform size, about  $0.89 \pm 0.122$  (n=22)  $\mu\text{m}$  in diameter, randomly distributed  
278 throughout the cytoplasm (Fig 1). These structures were observed to be spherical or  
279 disk-shaped, depending on the field of view. The shape and localization patterns of  
280 these labeled structures are suggestive of the Golgi apparatus(29,30). No green  
281 fluorescence could be detected in the vacuole and the nucleus. The cytoplasm in the  
282 *M. truncatula* root tips was almost filled with GFP-Rab11F labeled punctuate  
283 structures, which moved over very small distances (Fig 1B). At the elongation zone  
284 and up to the older parts of the roots, there was a continuous decrease in the numbers  
285 per volume of GFP labeled structures, with no changes in morphology (Fig 1D).  
286 Frequently, these structures were observed moving several  $\mu\text{m}$  through the cortical  
287 cytoplasm before they stopped (resting phase) or even reversed their direction of  
288 movement. These observations indicated the localization of Rab11F to the Golgi  
289 apparatus.

290

291 **Figure 1: Localisation of GFP-Rab11F in *M. truncatula* root cells.** Roots were  
292 transformed by the *Agrobacterium rhizogenes* strain ArQual1 carrying the GFP-  
293 Rab11F construct and investigated by confocal laser scanning microscopy (CLSM).  
294 The image shows cells in the elongation zone. In the cytoplasm of the root cells,  
295 several motile green fluorescent structures were randomly dispersed throughout the  
296 cytoplasm. Scale = 12.93  $\mu\text{m}$ .

297

298 **Effect of Brefeldin A (BFA) on the morphology and streaming**  
299 **movement of Rab11F-mGFP6 labeled structures**

300

301 To test the localization of Rab11F on the Golgi apparatus, the toxin Brefeldin A  
302 (BFA) was used. BFA is a fungal toxin which interferes with the transport of vesicles  
303 from the ER to the Golgi and alters the morphology of the plant Golgi stacks(29).  
304 Within minutes after the addition of BFA to GFP-Rab11F transiently transformed  
305 *Nicotiana benthamiana* epidermal cells, most of the GFP-Rab11F labeled structures  
306 disintegrated (Fig 2B), and the majority of the green fluorescence was dispersed  
307 throughout the cytoplasm with a higher concentration in a region around the nucleus.  
308 No fluorescence could be detected in the vacuole. The few remaining punctated  
309 structures in the cytoplasm had an average diameter of  $2.2087 \pm 0.4$  (n=10) larger  
310 than the GFP-Rab11F labeled structures ( $0.9041 \pm 0.22$   $\mu\text{m}$ ) (n=10) in not-treated  
311 cells. Besides, in BFA-treated cells, the streaming stop and go movement of GFP-  
312 Rab11F labeled structures was reduced to only very short distances or absent.

313

314 **Figure 2: Effect of (BFA) on GFP-Rab11F expressing *N. benthamiana* leaf cells.**

315 (A) GFP-Rab11F expressing leaf cell without BFA treatment. (B) Leaf epidermal cell  
316 30 min after application of BFA (50  $\mu$ g/ml). The GFP-Rab11F labeled structures  
317 formed non-motile aggregates. Scale = 25  $\mu$ m.

318

319 **Effect of dominant–negative Rab11F mutant on the Rab11F labeled**  
320 **structures.**

321

322 To study the function of Rab11F, an inactive mutant (GDP-locked) Rab11F,  
323 Rab11F(S29N), was generated by site-directed mutagenesis. Despite numerous  
324 transfection experiments, we were unable to transfect the Rab11F(S29N) construct  
325 into *M. truncatula* roots using the hairy root transformation method. However,  
326 transfection of the recombinant Rab11F(S29N) construct into tobacco BY-2  
327 protoplasts was successful, and we observed Rab11F(S29N)-GFP evenly distributed  
328 in the cytoplasm (Fig 3C) without any specific localization as seen with the wild type  
329 GFP-Rab11F (Fig 3A). These results suggested that Rab11F is vital in *M. truncatula*  
330 cells, and its loss of function leads to cell death.

331

332 **Figure 3: Localization of GFP-Rab11F and dominant negative mutant GFP-**

333 **Rab11FS29N in tobacco BY2-protoplasts: (A-B)** The images show tobacco By-2  
334 protoplasts expressing GFP-Rab11F green punctuate structures could be observed  
335 and were randomly dispersed throughout the cytoplasm. **(C-D)** The images show  
336 tobacco BY-2 protoplasts expressing the GFP labeled dominant negative mutant  
337 Rab11F-S29N. The GFP fluorescence was homogenously distributed throughout the

338 cytoplasm. Several protoplasts transfected with the mutant showed signs of ongoing  
339 cell death. Scale =12.84  $\mu$ m.

340

### 341 **Intracellular localization of Rab11**

342

343 To gather information on the identities of Rab11F-labeled organelles, *M. truncatula*  
344 root cells expressing GFP-Rab11F were incubated with FM4-64 for a short (30 min)  
345 and a long time (2 h). FM4-64 is a lipophilic dye used for staining endocytic vesicles  
346 and the vacuolar membranes. It acts in a time-dependent manner moving with the  
347 endocytotic pathway from the plasma membrane to vesicles and finally to the vacuole  
348 membrane(31). The plasma membrane of the *M. truncatula* root cells was stained  
349 immediately after the application of FM4-64 (Fig 4B). A few GFP-Rab11F labeled  
350 structures were rapidly stained after 5 minutes. (Fig 4C, arrowheads). Thirty minutes  
351 after the FM4-64 application, some small GFP-Rab11F labeled organelles (diameter  
352 of  $0.320 \pm 0.03$ , n=10) were additionally stained (Fig 4E), but these were the  
353 exceptions, and the red and green fluorescence of most structures were separated from  
354 each other. After two hours of incubation, the GFP-Rab11F labeled structures were  
355 completely stained (Fig 4I), and concomitantly the level of the FM4-64-staining of the  
356 plasma membrane was reduced.

357

### 358 **Figure 4: Colocalization of GFP-Rab11F and FM4-64 in *M. truncatula* root cells.**

359 Images were taken immediately after application of (A-C), after 30 min (D-F) and  
360 after 2h (G-I). GFP channel (A, D, G), dsRed channel (B, E, H) and overlay (C, F, I).

361 Directly after application of FM4-64 the plasma membrane was stained. After 30 min

362 GFP-Rab11F labeled structures were partly stained by FM4-64. After 2 hours, FM4-  
363 64 also stained all structures, which were labeled by GFP-Rab11F. Scale = 15  $\mu$ m.

364

### 365 **Rab11F is located to the trans-Golgi network**

366

367 For the further elucidation of the type of structure(s) labeled by GFP-Rab11F, we  
368 performed a co-localization experiment using GmMan1 fused to mCherry protein and  
369 GFP-Rab11F. GmMan1 is an  $\alpha$ -1,2-mannosidase-I from soybean that localizes at cis-  
370 Golgi stacks(27). *N. benthamiana* leaves were co-transfected with the GFP-Rab11F  
371 and GmMan1-mCherry constructs. The expression showed several small motile  
372 structures within the cytoplasm in the GFP and the mCherry channels (Fig 5A and  
373 5B). An overlay of both channels revealed that most of the Golgi bodies labeled by  
374 GmMan1-mCherry were also labeled by GFP-Rab11F (Fig 5C). A small number of  
375 structures showed either only red or green fluorescence. At higher magnification, a  
376 tricolored labeling pattern of the Golgi bodies became evident (Fig 5F). As GmMan1-  
377 mCherry is located at the cis-Golgi stacks whereas GFP-Rab11F labels the opposite  
378 side of the same structures, indicating that Rab11F is located on the trans-Golgi.

379

380 **Figure 5: Colocalization of GFP-Rab11F and GmMan1-mCherry in *N.***  
381 ***benthamiana* leaf epidermal cells.** *N. benthamiana* leaves were co-transfected by  
382 GFP-Rab11F and GmMan1-mCherry. GFP channel (A, D), DsRed channel (B, E)  
383 overlay (C, F). GFP-Rab11F and Man1-mCherry showed a partial colocalization at  
384 Golgi bodies. (E-F) At higher magnification, the Golgi bodies revealed a tricolored  
385 labeling pattern. Scale = (A-C) 50 $\mu$ m, (D-F) 10 $\mu$ m.

386



387

## 388 **Localization of GFP-Rab11F in *M. truncatula* root nodule**

389

390 Localization of GFP-Rab11F in the *M. truncatula* root nodule was determined by  
391 inoculating pBin-GFP-Rab11F transfected *M. truncatula* root cells with *S. meliloti*  
392 expressing red fluorescent protein mRFP1. Examination of nodule sections using  
393 CLSM revealed weak GFP-fluorescence on numerous punctate structures (data not  
394 shown). Most likely, the ripening of the GFP was hindered due to the low level of free  
395 oxygen in root nodules. Thus, we decided to use a peptide-specific polyclonal anti-  
396 Rab11F antibody(26) to investigate Rab11F-localization. Thin sections of 4-6 week-  
397 old, transformed root nodules inoculated with *S. meliloti* expressing mRFP1 were  
398 fixed, and immune-staining was carried out using an Alexa647-conjugated secondary  
399 antibody and examined using CLSM. The same procedure was repeated with non-  
400 transformed root nodules of wild type *M. truncatula* and *M. sativa*. Controls using the  
401 pre-immune serum or without primary antibody showed no label at any membrane.

402

403 In transgenic root nodules, anti-Rab11F-antibodies labeled small structures of nearly  
404 uniform size (1  $\mu\text{m}$ ) randomly dispersed in the cytoplasm especially around the  
405 infection thread, but showing high accumulation at the thread tip, where most of the  
406 Rab11F-labeled green structures were smaller (0.5  $\mu\text{m}$ ) (Fig 6A). Rab11F was also  
407 located on ring-like structures near the infection thread membrane (Fig 6A-6C),  
408 which were probably formed by the fusion of Rab11F-labeled structures.  
409 Interestingly, Rab11F-labeled structures also accumulated near putative release sites  
410 or infection droplets as revealed by the enlargement of the infection thread (Fig 6C).  
411 In rare cases, bacteria were not released from the infection droplet but directly from

412 the infection thread where they pass the cell-cell border and enter the next cell (Fig  
413 6D-6F). During the release, the bacteria were covered by Rab11F-labeled structures.

414

415 After the invasion, rhizobia begin to differentiate into nitrogen-fixing bacteroids.  
416 Each bacteroid was found to be enclosed by a membrane, which was labeled by anti-  
417 Rab11F antibodies (Fig 6G-I). In young infected *M. truncatula* cells, bacteroids were  
418 of different sizes: some were rod-shaped and 1  $\mu\text{m}$  in diameter while others were  
419 enlarged to a length of  $\sim 5 \mu\text{m}$ , 5 times larger than non-differentiated rhizobia.

420

421 During the maturation of the infected cells, the amount of Rab11F-labeled structures  
422 steadily decreased. There were cells not filled with bacteroids, and in between the  
423 bacteroids were numerous small Rab11F-labeled structures enclosing some of them,  
424 but there were some bacteroids that were not surrounded by Rab11F-positive  
425 membranes (Fig 6J-6L). In mature nitrogen-fixing cells, some Rab11F-labeled  
426 structures could be detected between the bacteroids, but the majority of them were no  
427 longer surrounded by the Rab11F-labeled membrane (Fig 6J-L).

428

429 **Figure 6: Localization of Rab11F and *S. meliloti*-mRFP1 in the young and**  
430 **mature root nodule cells. (A-C)** Rab11F-labeled structures accumulated around the  
431 infection thread and at the tip. Some of them were located on the extension of the  
432 infection thread membrane, forming a ring. The infection thread was enlarged to  
433 become an infection droplet with a diameter of 10  $\mu\text{m}$  and surrounded by Rab11F-  
434 positive structures. **(D-F)** At a cell-cell border, the infection thread membrane had  
435 fused with the plasma membrane of the neighbor host cell; the bacteria were then  
436 released into the cytoplasm. **(G-I)** Localization of Rab11F in young infected cells.

437 The infected cell contained several bacteria enclosed by a membrane labeled by  
438 Rab11F. Numerous Rab11F labeled green structure were located on the symbiosome  
439 membrane. **(J-K)** Localization of Rab11F in matured infected cells (mIF). The fully  
440 differentiated infected cells (mIF) were filled with bacteroids; however; no Rab11F  
441 positive structures are detectable. Most of the bacteroids were no longer enclosed by  
442 membrane labeled by Rab11F in matured infected cells (mIF). The young infected  
443 cells (IF) contained some Rab11F positive structures surrounding the bacteroid. In  
444 non-infected cells (NIF), numerous small punctate structures were dispersed in the  
445 cytoplasm with a diameter of approximately 1  $\mu\text{m}$ . Scale =(A-C) 25 $\mu\text{m}$ ., (D-F) 25 $\mu\text{m}$ ,  
446 (G-I) 7.5 $\mu\text{m}$ , (J-L)=10 $\mu\text{m}$ .

447

448

## 449 **Discussion**

450

451 The engulfment of *Rhizobia* into plant host cells occurs when the infection thread  
452 reaches the target cell. Within the host cell, each invaded bacterium is bound by the  
453 host-derived symbiosome membrane. As the bacteria divide, the symbiosome  
454 membrane surface area also has to expand, in most cases almost a hundred-fold in  
455 comparison to the original plasma membrane-derived symbiosome membrane(2).  
456 Thus, a large amount of membrane material must be mobilized to allow the expansion  
457 of the symbiosome membrane.

458

459 Rab11F, a regulator of membrane trafficking, is highly expressed in nodules when the  
460 symbiosome membrane proliferates(26). We postulate that Rab11F is involved in the

461 expansion of the symbiosome membrane. This notion is further supported by the  
462 findings that the high level of expression of the *rab11f* gene is correlated with that of  
463 the *dnf1* gene, which is essential for the establishment of symbiosis(23,26). To test  
464 this hypothesis, we traced the presence and the intracellular distribution of Rab11F by  
465 transfecting *M. truncatula* with a plasmid construct expressing a GFP-Rab11F fusion  
466 protein. Rab11F was shown to be localized on punctate structures in a pattern similar  
467 to that of the Golgi apparatus under normal conditions. By treatment with Brefeldin A  
468 (BFA), a fungal inhibitor causing aggregation of TGN and endosomes(32), the  
469 Rab11F labeled structures were aggregated from the spherical structure to BFA-  
470 induced compartments, which had been seen in BFA-treated TGN and endosomes  
471 indicating that these punctate structures are either TGN or endosomes(33,34). Co-  
472 localization experiments using the cis-Golgi marker, GmMan1, showed three colored  
473 organelles, red, yellow, and green. Rab11F labeled structures were located opposite to  
474 the cis-Golgi, indicating that Rab11F was located on TGN. However, there were some  
475 of these structures showing only one color; green, or red, without any other colors  
476 observed. These occurred possibly through the movement of the labeled structures  
477 showing only one side of them. The presence of Rab11F at the TGN is consistent with  
478 the function of Rab11-subfamily in animals and yeast, where Rab11s are involved in  
479 the recycling of plasma membrane-derived endosomes(19,20) and the secretion of  
480 TGN buddings to the plasma membrane(22). In plants, several studies have shown  
481 that Rab11/RabAs are associated with the secretory pathway from the TGN to the  
482 plasma membrane(35–37).

483

484 In animal cells, TGNs are the main sorting station of the post-Golgi pathway,  
485 delivering various cargo to the plasma membrane, and receiving cargo from

486 endosomal compartments(38,39). In plants, some reports showed that TGN was  
487 similar to the partially coated reticulum (PCR) identified as an early endosomal  
488 compartment containing clathrin-coated pits(40). By electron microscopy/tomography  
489 of non-meristematic cells revealed two types of TGNs: GA-TGNs (Golgi associated  
490 TGN) and GI-TGNs (Golgi released independent TGNs)(41,42). GA-TGNs are  
491 located on the trans-side of the Golgi apparatus, whereas GI-TGNs are located  
492 distantly from Golgi and move independently. GI-TGNs are smaller than GA-TGNs  
493 and mostly fragment into SVs and clathrin-coated vesicles (CCVs)(43). In Maize,  
494 several secretory vesicles fragmented from GI-TGN were observed in the vicinity of  
495 the growing point of the secondary cell wall or called wall in growth (WIG) of the  
496 basal endosperm transfer cell (BETC) during the maturing process to supply of new  
497 cell wall polysaccharides from the Golgi(44).

498

499 In the *M. truncatula* nodules, various Rab11F-labeled structures were found dispersed  
500 throughout the cytoplasm at high density and presented the same pattern as GA-TGN.  
501 However, several Rab11F labeled structures were located in the vicinity of the  
502 infection thread, and the peribacteroid membrane displaying smaller in size (~ 0.5  
503  $\mu\text{m}$ ) suggesting that they are GI-TGN or TGN derived vesicles. These interpretations  
504 are consistent with previous electron microscopic studies in which numerous Golgi-  
505 derived vesicles were found in the vicinity of the infection thread membranes(45).  
506 Rab11Fs were located on both the infection thread membrane and the peribacteroid  
507 membrane, even though the structure of the peribacteroid membrane are different  
508 from those of the infection thread membrane, which generates the cell wall.

509

510 When the infection thread reaches its target cell, the CLSM-images revealed two  
511 locations where the bacteria are released, namely, as infection droplets or into  
512 intercellular space. The bacterial invasion process in the intercellular space occurs  
513 through the formation of an extension of the infection thread projecting into the  
514 underlying cell layer through the fusion with the distal cell wall, thereby allowing  
515 bacteria to enter the intercellular space and to degrade the proximal cell wall. This  
516 invagination is similar to that seen at the beginning of the root hair curl(46).  
517 However, upon releasing the bacteria, the formation of the infection thread wall is  
518 suppressed, allowing the bacteria to make contact with the host cell plasma  
519 membrane, resulting in the engulfment of the bacteria. The symbiosome membrane  
520 acquires Rab11F immediately during the invasion process and throughout its  
521 differentiation. When the bacteroids matured, no Rab11F was present on their  
522 peribacteroid membranes.

523 In animals, bacteria enter the cell through phagocytosis and undergo a maturation  
524 process within the endosome, from the Rab5-labeled early endosome to the Rab7-  
525 labeled late endosome(9). However, in plants, symbiosomes do not acquire Rab5 at  
526 any stage of bacterial development but do so after the bacteria have stopped dividing  
527 (12). The presence of Rab11F on the TGN and the peribacteroid membrane during  
528 bacterial engulfment and symbiosome maturation suggests that the function of  
529 Rab11F is involved in secretion, which is consistent with reports of the presence of  
530 membrane-type syntaxin SYP132. SYP132 resides on organelles of the secretory  
531 system and on symbiosome membranes (12,47), suggesting that the secretory  
532 pathway is essential for the symbiosome formation. This is in agreement with the  
533 report of Wang et al. (2010) postulating that effective symbiosome formation requires  
534 an orderly secretion of protein constituents through coordinated up-regulation of a

535 nodule-specific pathway involving GTPase Rab11(23). In bacterial infections of  
536 humans and animals, Rab11 is a prominent target for the invading pathogen (48). As  
537 shown by Limpens et al. (2009), the symbiosome membrane does not recruit the TGN  
538 marker SYP4 and is therefore not part of the conventional secretory pathway. The  
539 symbiosomes are locked in an SYP132/Rab7-positive endosome stage(12).

540 Further on, two highly homologous exocytotic vesicle-associated membrane proteins  
541 (VAMPs) are required for the biogenesis of the symbiotic membrane(49). Silencing  
542 of VAMP72 blocks the rhizobial symbiosome formation as well as arbuscule  
543 formation in mycorrhizal interaction. This suggests that an ancient exocytotic  
544 pathway forming the periarbuscular membrane compartment has also been coopted in  
545 the *Rhizobium*–Legume symbiosis(49). A symbiosome-specific modification of the  
546 extracellular matrix, namely pectins, could be part of the evolution of this specific  
547 pathway(50). In this complex network of changing membrane identities Rab11F, and  
548 specifically the analyzed isoform RabA6b, could contribute to delivering specific  
549 cargos from the TGN to the early symbiosome.

550

551 Most interestingly, *Rhizobial* release occurs only in the very young plant cells close to  
552 the meristem(51). Cell division involves the endocytotic uptake of material from the  
553 apoplastic space (52). A key regulator of this process is the Rab11 isoform  
554 RabA1d(18). This fact could give a clue to the question of the evolutionary origin of  
555 the intracellular symbiosis. Ancestral forms of *Rhizobium* could have gained access to  
556 the endocytotic pathway needed for cell plate formation in dividing cells. Plant  
557 mutants or active interference of *Rhizobia* could have contributed to the establishment  
558 of the symbiosome as a transient organelle.

559

560

## 561 Acknowledgments

562

563 This work was supported by grants from the DFG and Bielefeld University. The  
564 authors thank Prof. Dr. Ton Bisseling for the *S. meliloti* strain Sm2011-mRFP1, Dr.  
565 Andreas Nebenführ for the GmMan1-mCherry vector, and Prof. Dr. Prapon Wilairat  
566 for a critical reading of the manuscript.

567

## 568 References

569

- 570 1. Oldroyd GED, Murray JD, Poole PS, Downie JA. The rules of engagement in  
571 the legume-rhizobium symbiosis. *Annu Rev Genet.* 2011;45:119–44.
- 572 2. Brewin NJ. Plant cell wall remodelling in the rhizobium-legume symbiosis.  
573 *CRC Crit Rev Plant Sci.* 2004;23(4):293–316.
- 574 3. Timmers AC, Auriac MC, Truchet G. Refined analysis of early symbiotic steps  
575 of the *Rhizobium-Medicago* interaction in relationship with microtubular  
576 cytoskeleton rearrangements. *Development.* 1999;126(16):3617–28.
- 577 4. Rathbun EA, Naldrett MJ, Brewin NJ. Identification of a family of extensin-  
578 like glycoproteins in the lumen of *Rhizobium* -induced infection threads in pea  
579 root nodules. *Mol Plant Microbe Interact.* 2002;15(4):350–9.
- 580 5. Samaj J, Baluska F, Voigt B, Schlicht M, Volkmann D, Menzel D, et al.  
581 Endocytosis, actin cytoskeleton, and signaling. *Plant Physiol.* 2004;135:1150–



- 582 61.
- 583 6. Robinson DG, Jiang L, Schumacher K. The endosomal system of plants:  
584 charting new and familiar territories. *Plant Physiol.* 2008;147(4):1482–92.
- 585 7. Munro S. Organelle identity and the targeting of peripheral membrane proteins.  
586 *Curr Opin Cell Biol.* 2002;14(4):506–14.
- 587 8. Wandinger-Ness A, Zerial M. Rab proteins and the compartmentalization of  
588 the endosomal system. *Cold Spring Harb Perspect Biol.* 2014;6(11):1–25.
- 589 9. Vergne I, Chua J, Lee H-H, Lucas M, Belisle J, Deretic V. Mechanism of  
590 phagolysosome biogenesis block by viable *Mycobacterium tuberculosis*. *Proc*  
591 *Natl Acad Sci.* 2005;102(11):4033–8.
- 592 10. Poteryaev D, Datta S, Ackema K, Zerial M, Spang A. Identification of the  
593 switch in early-to-late endosome transition. *Cell* 2010;141(3):497–508.
- 594 11. Gutierrez MG. The process of phagosome maturation. *Small GTPases.*  
595 2013;4(3):148–58.
- 596 12. Limpens E, Ivanov S, van Esse W, Voets G, Fedorova E, Bisseling T.  
597 *Medicago* N<sub>2</sub>-fixing symbiosomes acquire the endocytic identity marker Rab7  
598 but delay the acquisition of vacuolar identity. *Plant Cell.* 2009;21(9):2811–28.
- 599 13. Ueda T, Uemura T, Sato MH, Nakano A. Functional differentiation of  
600 endosomes in *Arabidopsis* cells. *Plant J.* 2004;40(5):783–9.
- 601 14. Tse YC. Identification of multivesicular bodies as prevacuolar compartments in  
602 *Nicotiana tabacum* BY-2 Cells. *Plant Cell.* 2004;16(3):672–93.
- 603 15. Lam SK, Siu CL, Hillmer S, Jang S, An G, Robinson DG, et al. Rice SCAMP1  
604 defines clathrin-coated, trans-Golgi-located tubular-vesicular structures as an  
605 early endosome in tobacco BY-2 cells. *Plant Cell.* 2007;19(1):296–319.
- 606 16. Dettmer J, Hong-Hermesdorf A, Stierhof Y-D, Schumacher K. Vacuolar H<sup>+</sup>-

- 607 ATPase activity is required for endocytic and secretory trafficking in  
608 *Arabidopsis*. *Plant Cell*. 2006;18(3):715–30.
- 609 17. Chow C-M, Neto H, Foucart C, Moore I. Rab-A2 and Rab-A3 GTPases define  
610 a trans-Golgi endosomal membrane domain in *Arabidopsis* that contributes  
611 substantially to the cell plate. *Plant Cell*. 2008;20(1):101–23.
- 612 18. Berson T, von Wangenheim D, Takáč T, Šamajová O, Rosero A, Ovečka M, et  
613 al. Trans-Golgi network localized small GTPase RabA1d is involved in cell  
614 plate formation and oscillatory root hair growth. *BMC Plant Biol*.  
615 2014;14(1):1–16.
- 616 19. Schlierf B, Fey GH, Hauber J, Hocke GM, Rosorius O. Rab11b is essential for  
617 recycling of transferrin to the plasma membrane. *Exp Cell Res*.  
618 2000;259(1):257–65.
- 619 20. Wilcke M, Johannes L, Galli T, Mayau V, Goud B, Salamero J. Rab11  
620 regulates the compartmentalization of early endosomes required for efficient  
621 transport from early endosomes to the trans-Golgi network. *J Cell Biol*.  
622 2000;151(6):1207–20.
- 623 21. Toyooka K, Goto Y, Asatsuma S, Koizumi M, Mitsui T, Matsuoka K. A  
624 mobile secretory vesicle cluster involved in mass transport from the Golgi to  
625 the plant cell exterior. *Plant Cell*. 2009;21:1212–29.
- 626 22. Chen W, Feng Y, Chen D, Wandinger-Ness A. Rab11 is required for trans-  
627 golgi network-to-plasma membrane transport and a preferential target for GDP  
628 dissociation inhibitor. *Mol Biol Cell*. 1998;9(11):3241–57.
- 629 23. Wang D, Griffiths J, Starker C, Fedorova E, Limpens E, Ivanov S, et al. A  
630 nodule-specific protein secretory pathway required for nitrogen-fixing  
631 symbiosis. *Science*. 2010;327(2010):1126–9.

- 632 24. Blanco FA, Peltzer Meschini E, Zanetti ME, Aguilar OM. A small GTPase of  
633 the Rab family is required for root hair formation and preinfection stages of the  
634 common bean-*Rhizobium* symbiotic association. *Plant Cell*. 2009;21(9):2797–  
635 810.
- 636 25. Whitehead LF, Day DA. The peribacteroid membrane. *Physiol Plant*.  
637 1997;100(1):30–44.
- 638 26. Schiene K, Donath S, Brecht M, Puehler A, Niehaus K. A Rab-related small  
639 GTP binding protein is predominantly expressed in root nodules of *Medicago*  
640 *sativa*. *Mol Gen Genomics* 2004;272:57–66.
- 641 27. Nelson BK, Cai X, Nebenfuehr A. A multicolored set of in vivo organelle  
642 markers for co-localization studies in *Arabidopsis* and other plants. *Plant J*.  
643 2007;1126–36.
- 644 28. Boisson-dernier A, Chabaud M, Garcia F, Bécard G, Rosenberg C, Barker DG,  
645 et al. *Agrobacterium rhizogenes* -transformed roots of *Medicago truncatula* for  
646 the study of nitrogen-fixing and endomycorrhizal symbiotic associations. *Mol*  
647 *Plant Microbe Interact* 2001;14(6):695–700.
- 648 29. Ritzenthaler C, Nebenführ A, Movafeghi A, Stussi-garud C, Behnia L, Pimpl  
649 P, et al. Reevaluation of the effects of brefeldin A on plant cells using Tobacco  
650 Bright Yellow 2 cells expressing Golgi-targeted green fluorescent protein and  
651 COPI antisera. 2002;14:237–61.
- 652 30. Hawes C, Satiat-Jeunemaitre B. The plant Golgi apparatus — going with the  
653 flow. 2005;1744:93–107.
- 654 31. Bolte S, Talbot C, Boutte Y, Catrice O, Read ND, Satiat-Jeunemaitre B. FM-  
655 dyes as experimental probes for dissecting vesicle trafficking in living plant  
656 cells. *J Microsc*. 2004;214(2):159–73.

- 657 32. Ito Y, Toyooka K, Fujimoto M, Ueda T, Uemura T, Nakano A. The trans-golgi  
658 network and the golgi stacks behave independently during regeneration after  
659 brefeldin A treatment in tobacco BY-2 cells. *Plant Cell Physiol.*  
660 2017;58(4):811–21.
- 661 33. Geldner N, Friml J, Stierhof YD, Jürgens G, Palme K. Auxin transport  
662 inhibitors block PIN1 cycling and vesicle trafficking. *Nature.*  
663 2001;413(6854):425–8.
- 664 34. Grebe M, Xu J, Moebius W, Ueda T, Nakano A, Geuze HJ, et al. Arabidopsis  
665 sterol endocytosis involves actin-mediated trafficking via Ara6-positive early  
666 endosomes. *Curr Biol.* 2003;13:1378–87.
- 667 35. Rehman RU, Stigliano E, Lycett GW, Sticher L, Sbrana F, Faraco M, et al.  
668 Tomato Rab11a characterization evidenced a difference between SYP121-  
669 dependent and SYP122-dependent exocytosis. *Plant Cell Physiol.*  
670 2008;49(5):751–66.
- 671 36. de Graaf BHJ. Rab11 GTPase-regulated membrane trafficking is crucial for  
672 tip-focused pollen tube growth in tobacco. *Plant Cell.* 2005;17(9):2564–79.
- 673 37. Preuss ML, Serna J, Falbel TG, Bednarek SY, and Nielson, E. The *Arabidopsis*  
674 Rab GTPase RabA4b localizes to the tips of growing root hair cells. *Plant Cell,*  
675 16:1589–1603.
- 676 38. Shewan AM, Dam EM Van, Martin S, Luen TB, Hong W, Bryant NJ, et al.  
677 GLUT4 recycles via a trans -Golgi Network ( TGN ) subdomain enriched in  
678 syntaxins 6 and 16 but not TGN38 : involvement of an acidic targeting motif.  
679 2010;14:973–86.
- 680 39. Pavelka M, Ellinger A, Debbage P, Loewe C, Vetterlein M, and Roth J.  
681 Endocytic routes to the Golgi apparatus. *Histochem Cell Biol* 1998;555–70.

- 682 40. Staehelin LA, and Moore I. The plant golgi apparatus : structure , functional  
683 organization and trafficking mechanisms. *Annu. Rev. Plant Physiol. Plant Mol.*  
684 *Biol.* 1995;46:261-88
- 685 41. Kang BH, Nielsen E, Preuss ML, Mastronarde D, and Staehelin LA. Electron  
686 tomography of RabA4b- and PI-4K $\beta$ 1-labeled trans Golgi network  
687 compartments in *Arabidopsis*. *Traffic.* 2011;12(3):313–29.
- 688 42. Uemura T, Suda Y, Ueda T, Nakano A. Dynamic behavior of the trans-golgi  
689 network in root tissues of arabidopsis revealed by super-resolution live  
690 imaging. *Plant Cell Physiol.* 2014;55(4):694–703.
- 691 43. Kang BH. Shrinkage and fragmentation of the trans-golgi network in non-  
692 meristematic plant cells. *Plant Signal Behav.* 2011;6(6):884–6.
- 693 44. Kang B, Xiong Y, Williams DS, Pozueta-romero D, Chourey PS. Miniature1 -  
694 encoded cell wall invertase is essential for assembly and function of wall-in-  
695 growth in the maize. 2009;151:1366–76.
- 696 45. Robertson JG, Lyttleton P, Bullivant S, Grayston GF. Membranes in lupin root  
697 nodules. I. The role of Golgi bodies in the biogenesis of infection threads and  
698 peribacteroid membranes. *J Cell Sci.* 1978;30:129–49.
- 699 46. Gage DJ. Infection and invasion of roots by symbiotic, nitrogen-fixing  
700 Rhizobia during nodulation of temperate legumes. *Microbiol Rev*  
701 2004;68(2):280–300.
- 702 47. Catalano CM, Czymmek KJ, Gann JG, Sherrier DJ. *Medicago truncatula*  
703 syntaxin SYP132 defines the symbiosome membrane and infection droplet  
704 membrane in root nodules. *Planta.* 2007;225(3):541–50.
- 705 48. Guichard A, Nizet V, Bier E. RAB11-mediated trafficking in host-pathogen  
706 interactions. *Nat Rev Microbiol.* 2014;12(9):624–34.

- 707 49. Ivanov S, Fedorova EE, Limpens E, De Mita S, Genre A, Bonfante P, et al.  
708 Rhizobium-legume symbiosis shares an exocytotic pathway required for  
709 arbuscule formation. *Proc Natl Acad Sci.* 2012;109(21):8316–21.
- 710 50. Gavrin A, Chiasson D, Ovchinnikova E, Kaiser BN, Bisseling T, Fedorova EE.  
711 VAMP721a and VAMP721d are important for pectin dynamics and release of  
712 bacteria in soybean nodules. *New Phytol.* 2016;210(3):1011–21.
- 713 51. Xiao TT, Schilderink S, Moling S, Deinum EE, Kondorosi E, Franssen H, et al.  
714 Fate map of *Medicago truncatula* root nodules. *Development.*  
715 2014;141(18):3517–28.
- 716 52. Dhonukshe P, Baluška F, Schlicht M, Hlavacka A, Šamaj J, Friml J, et al.  
717 Endocytosis of cell surface material mediates cell plate formation during plant  
718 Cytokinesis. *Dev Cell.* 2006;10(1):137–50.  
719



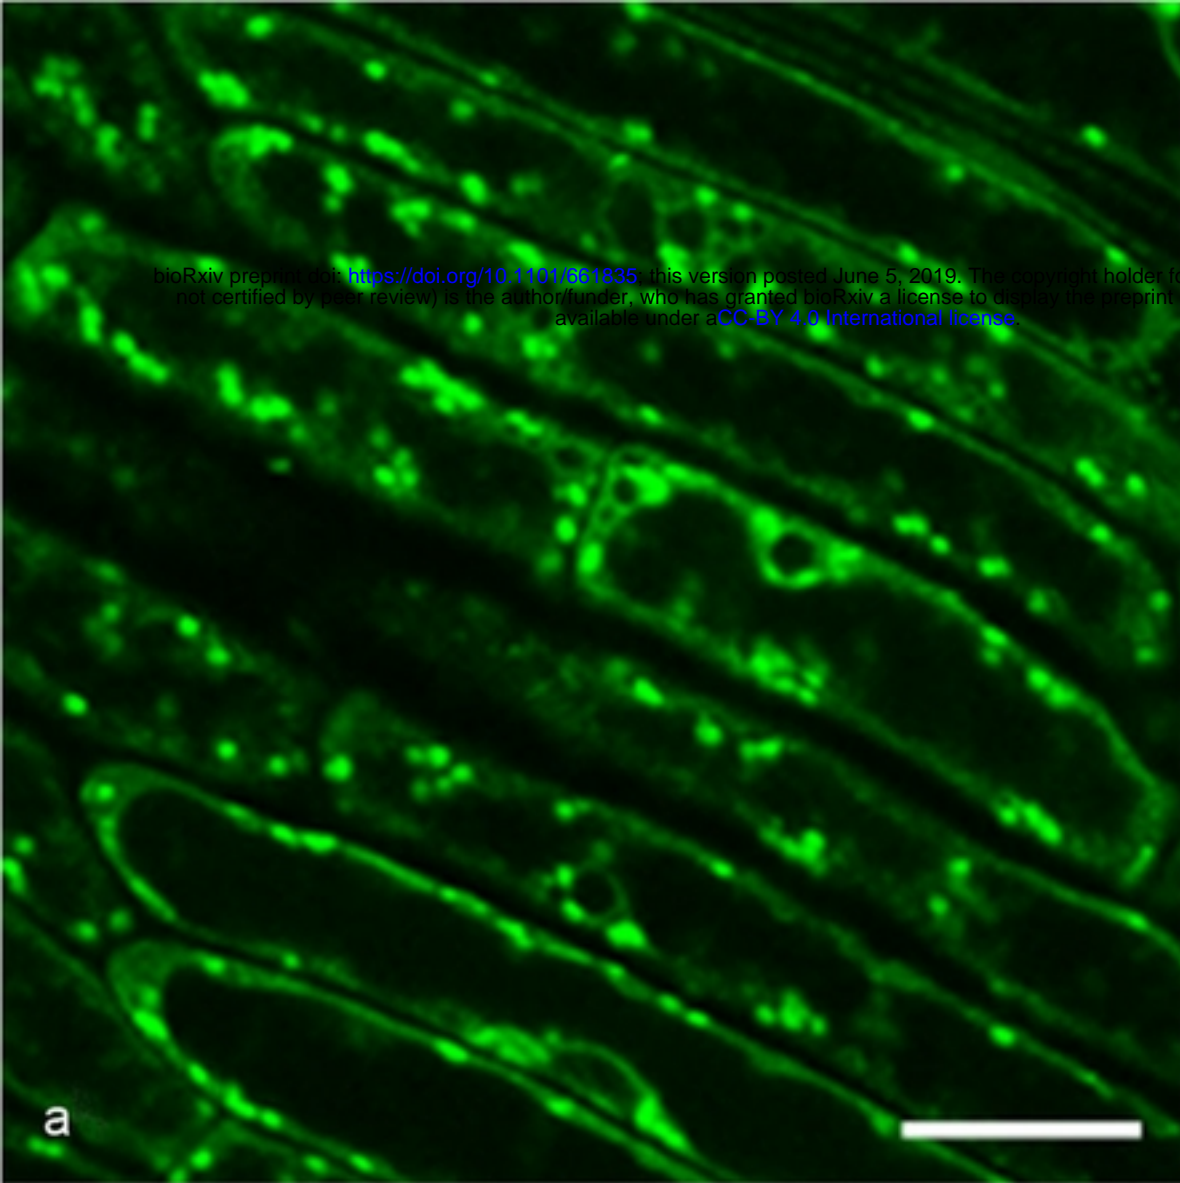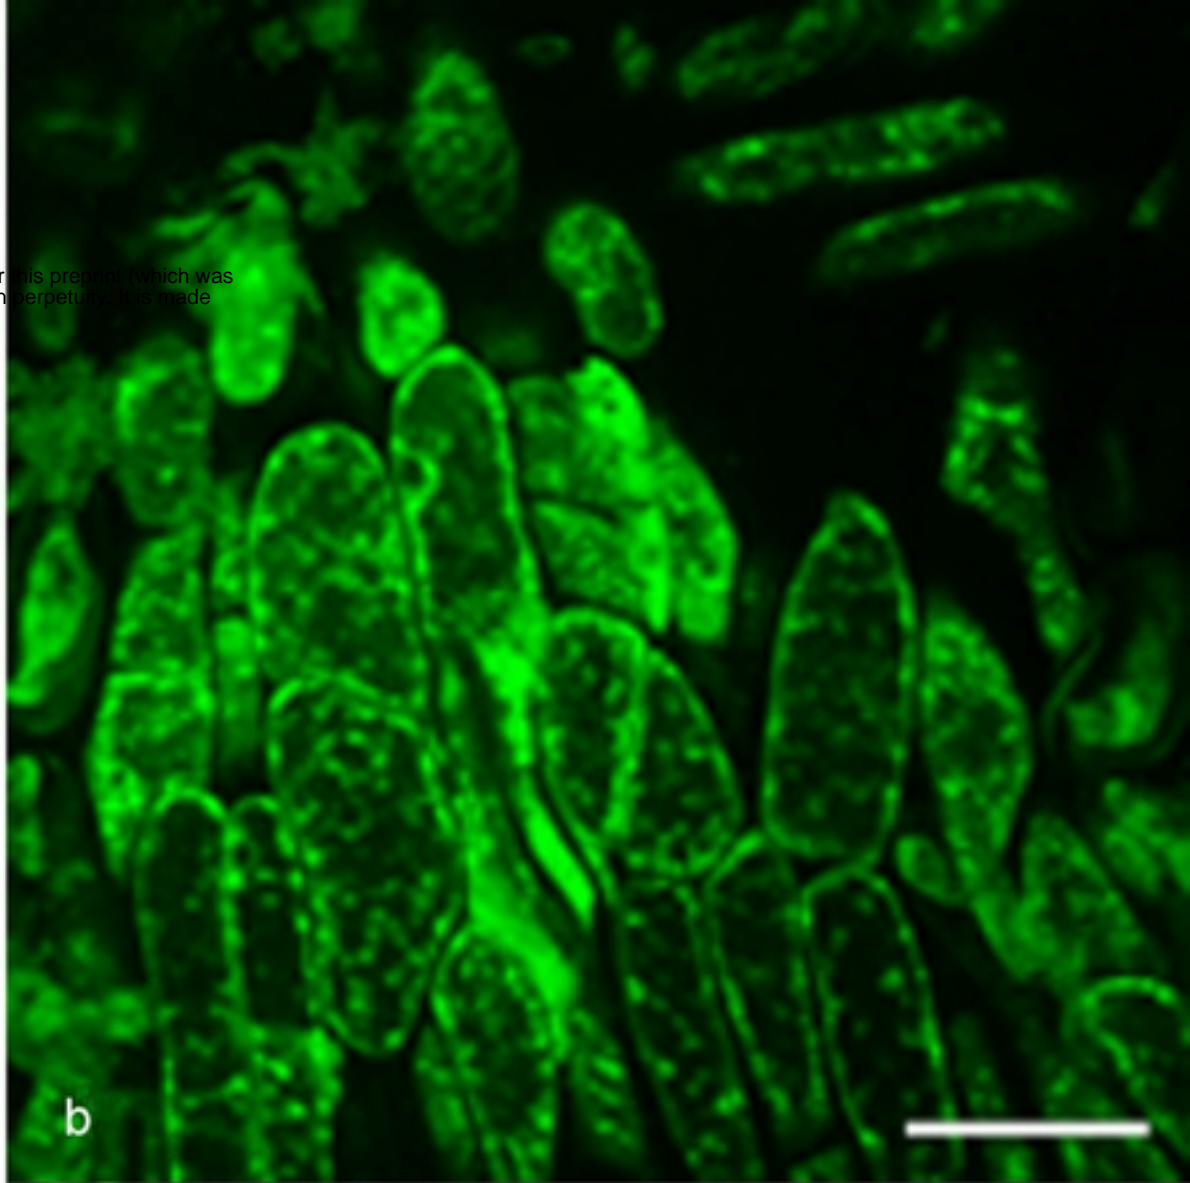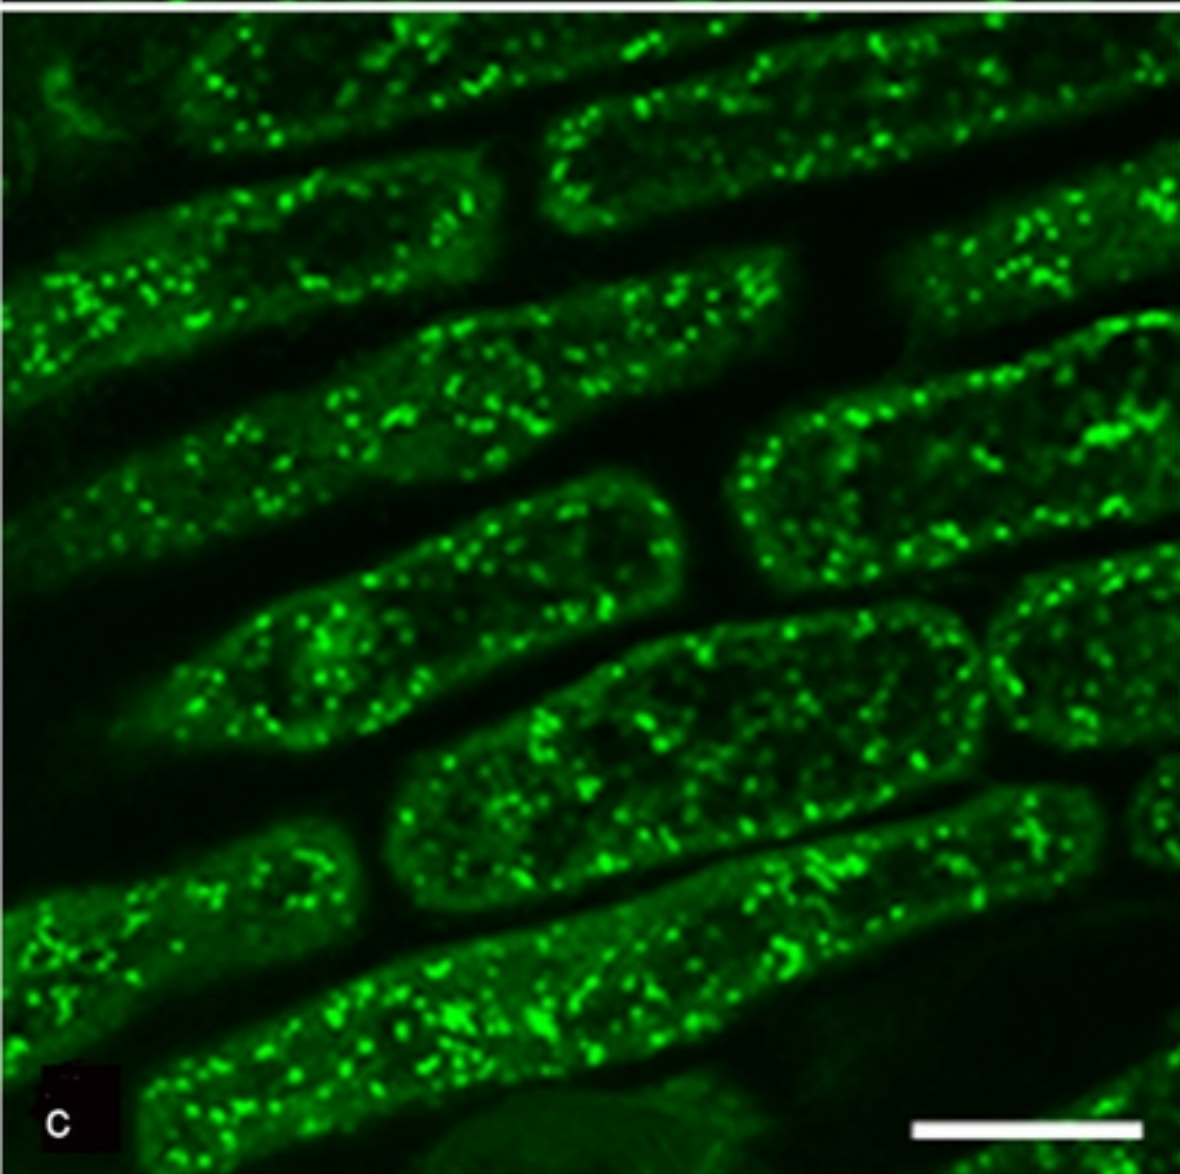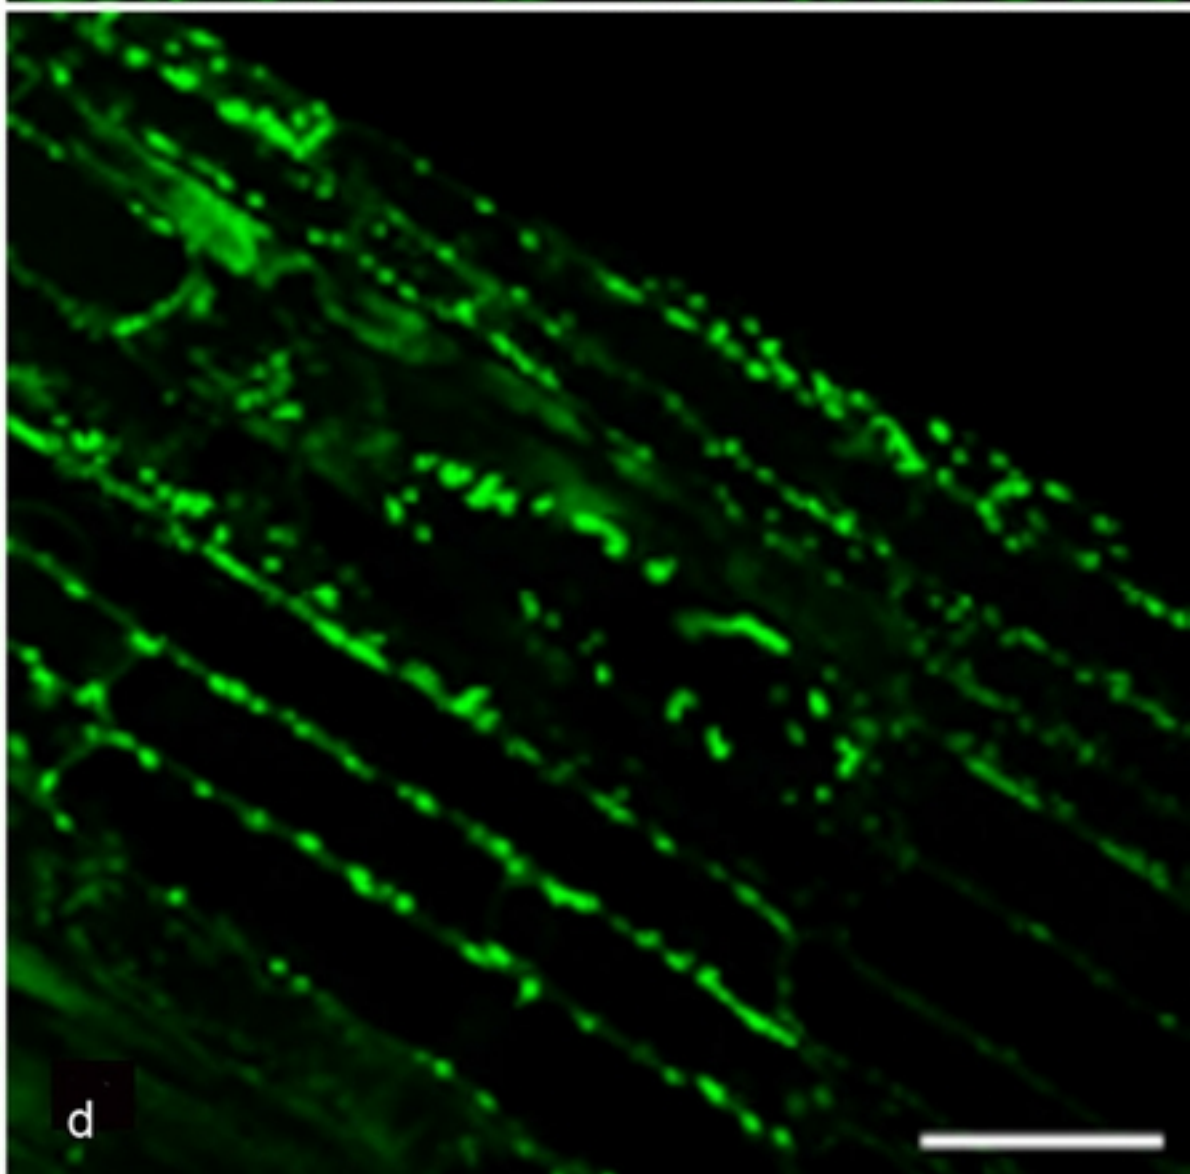

Figure 1

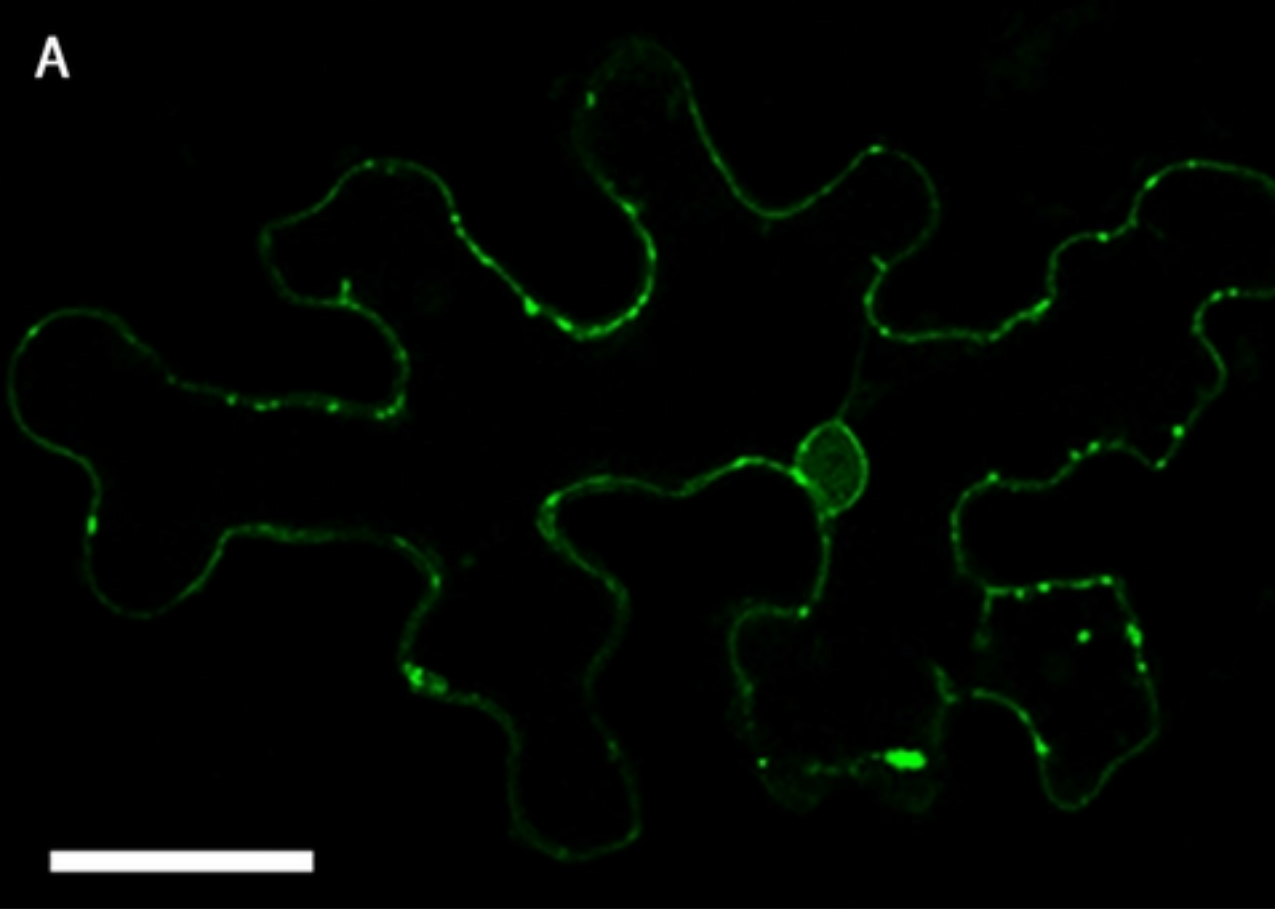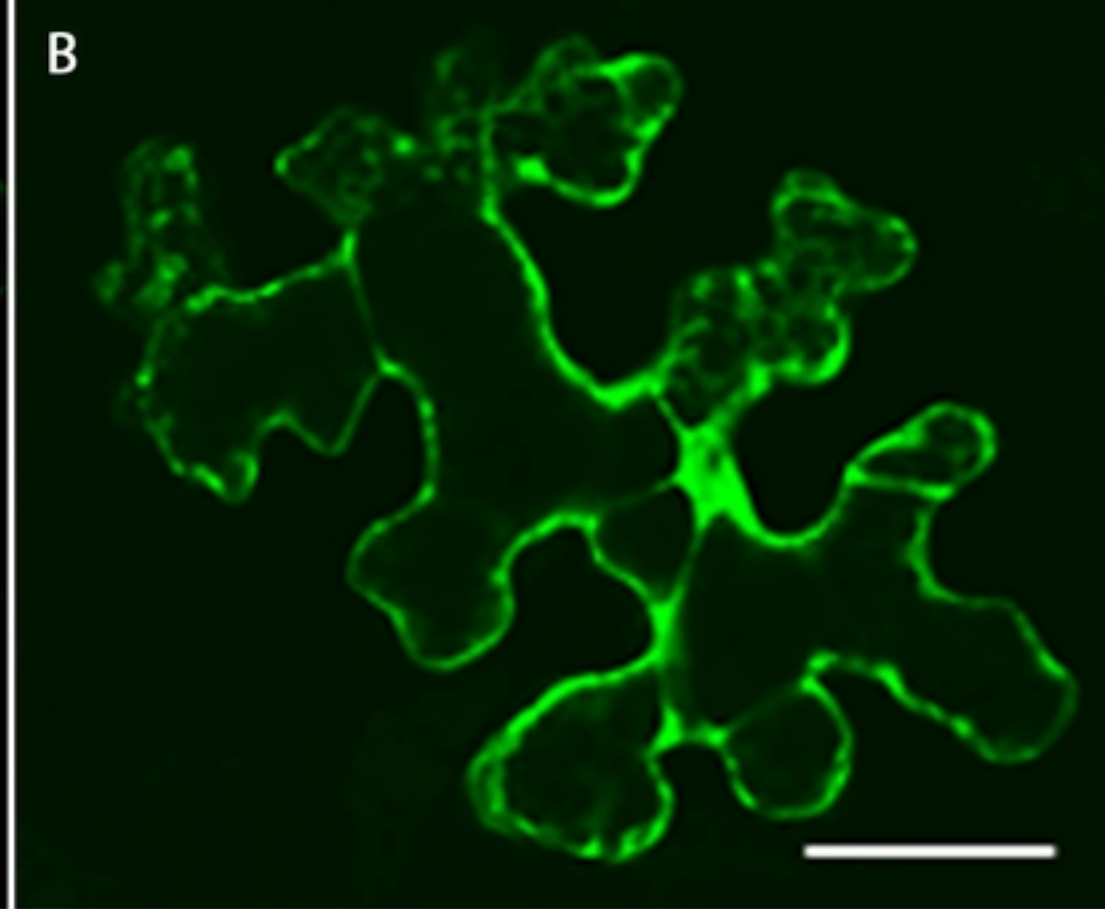

Figure 2



**A**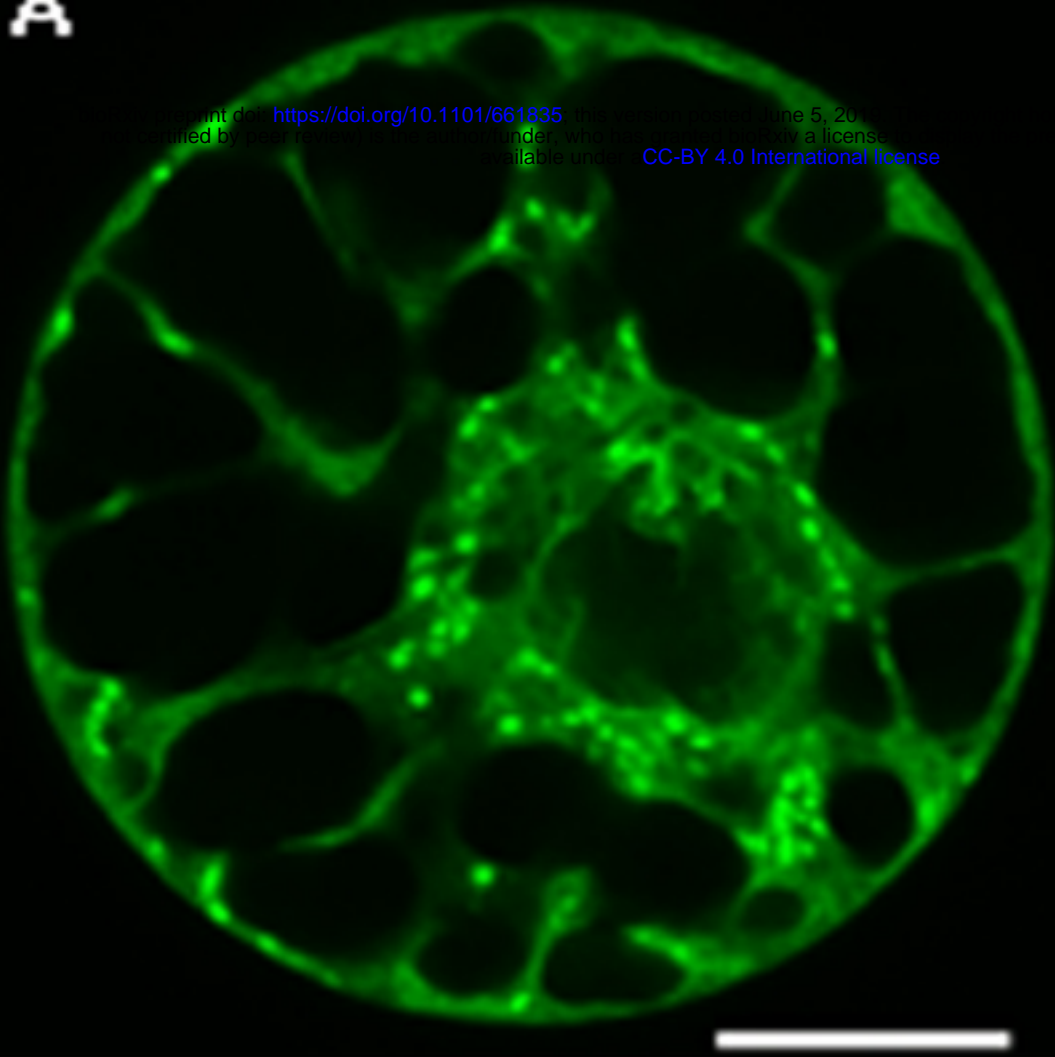**B**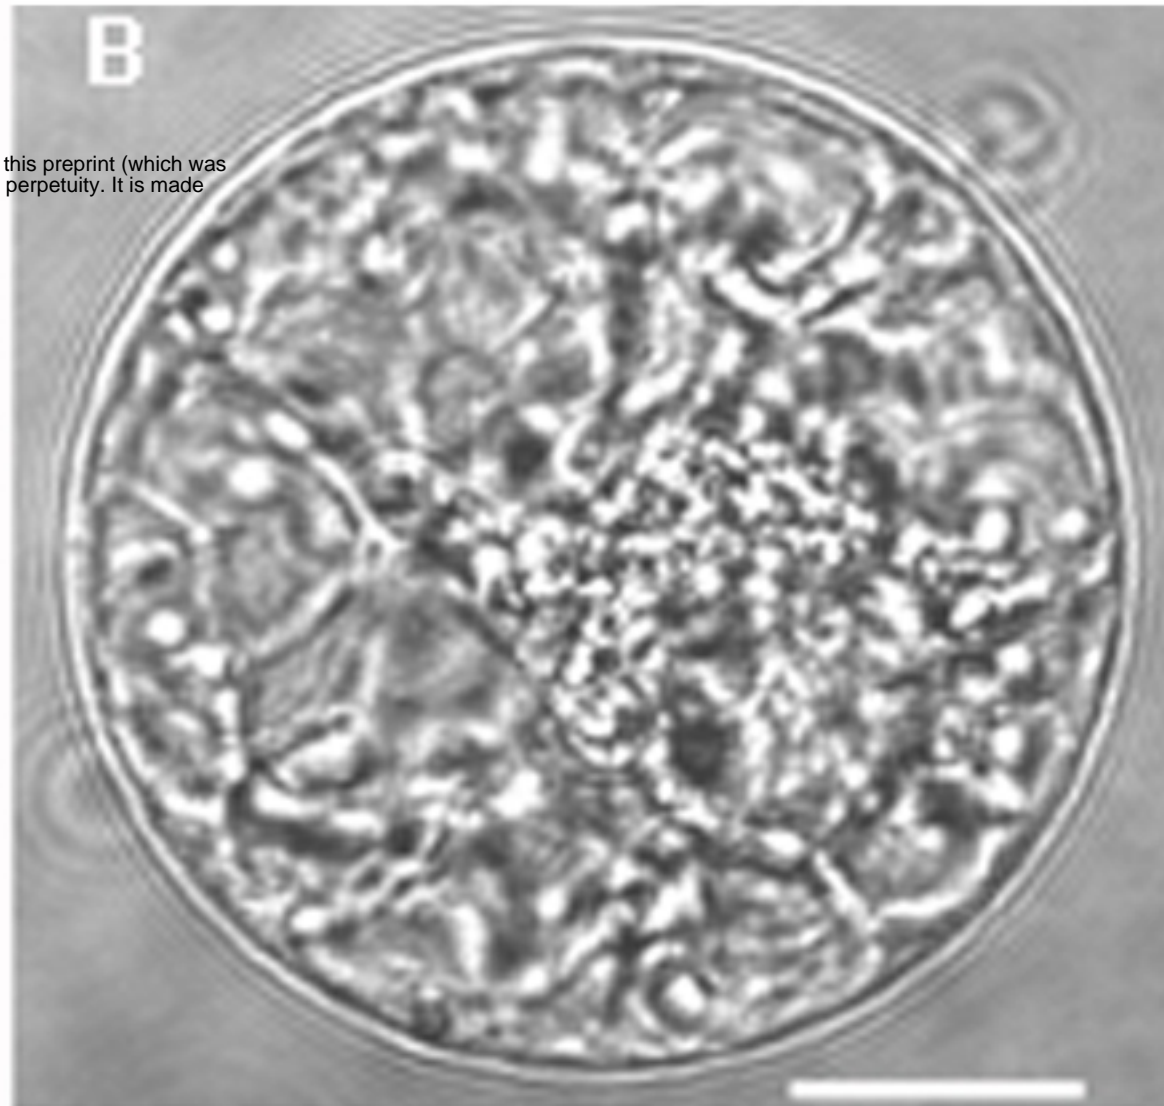**C**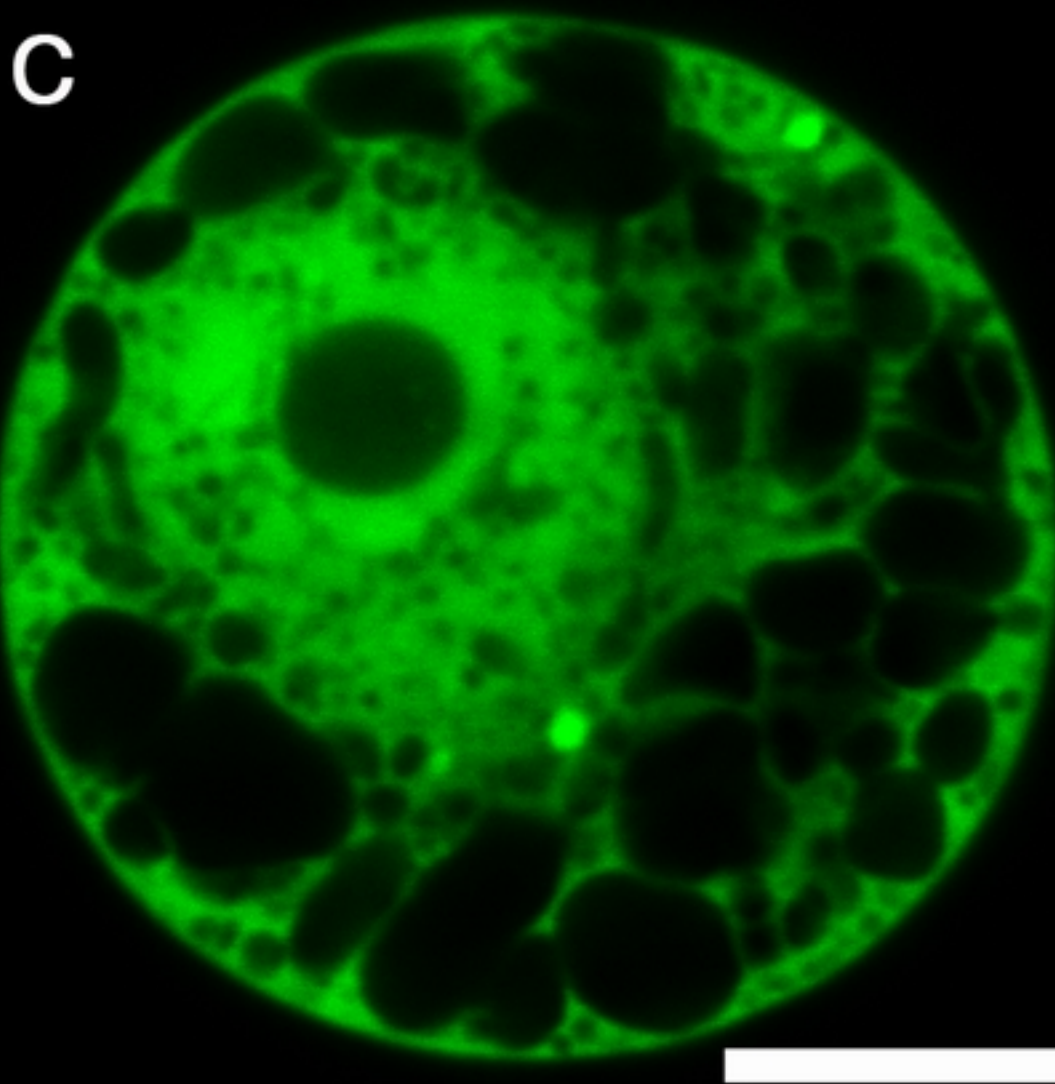**D**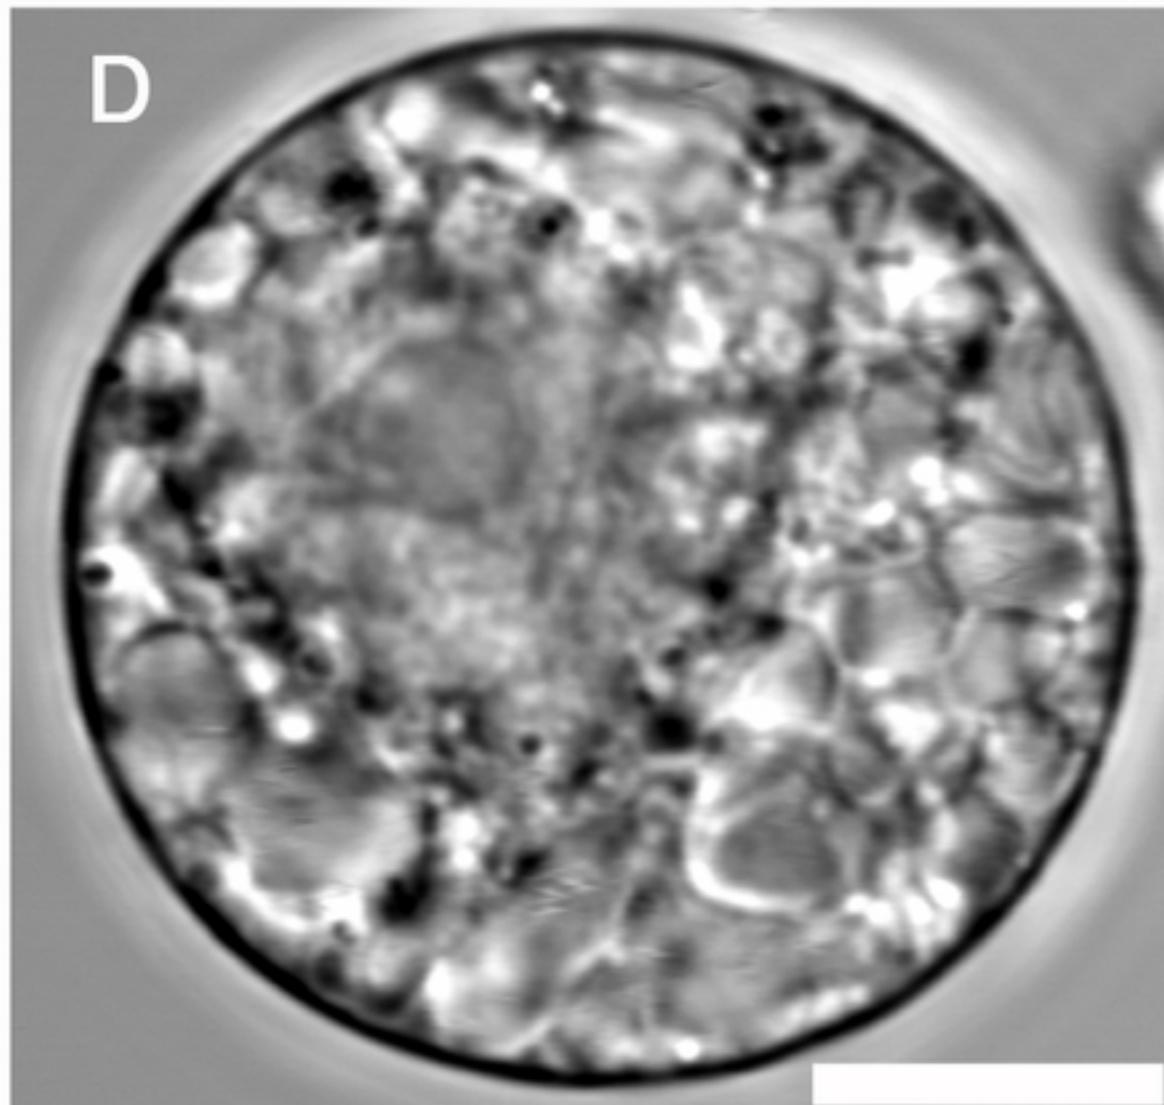**Figure3**

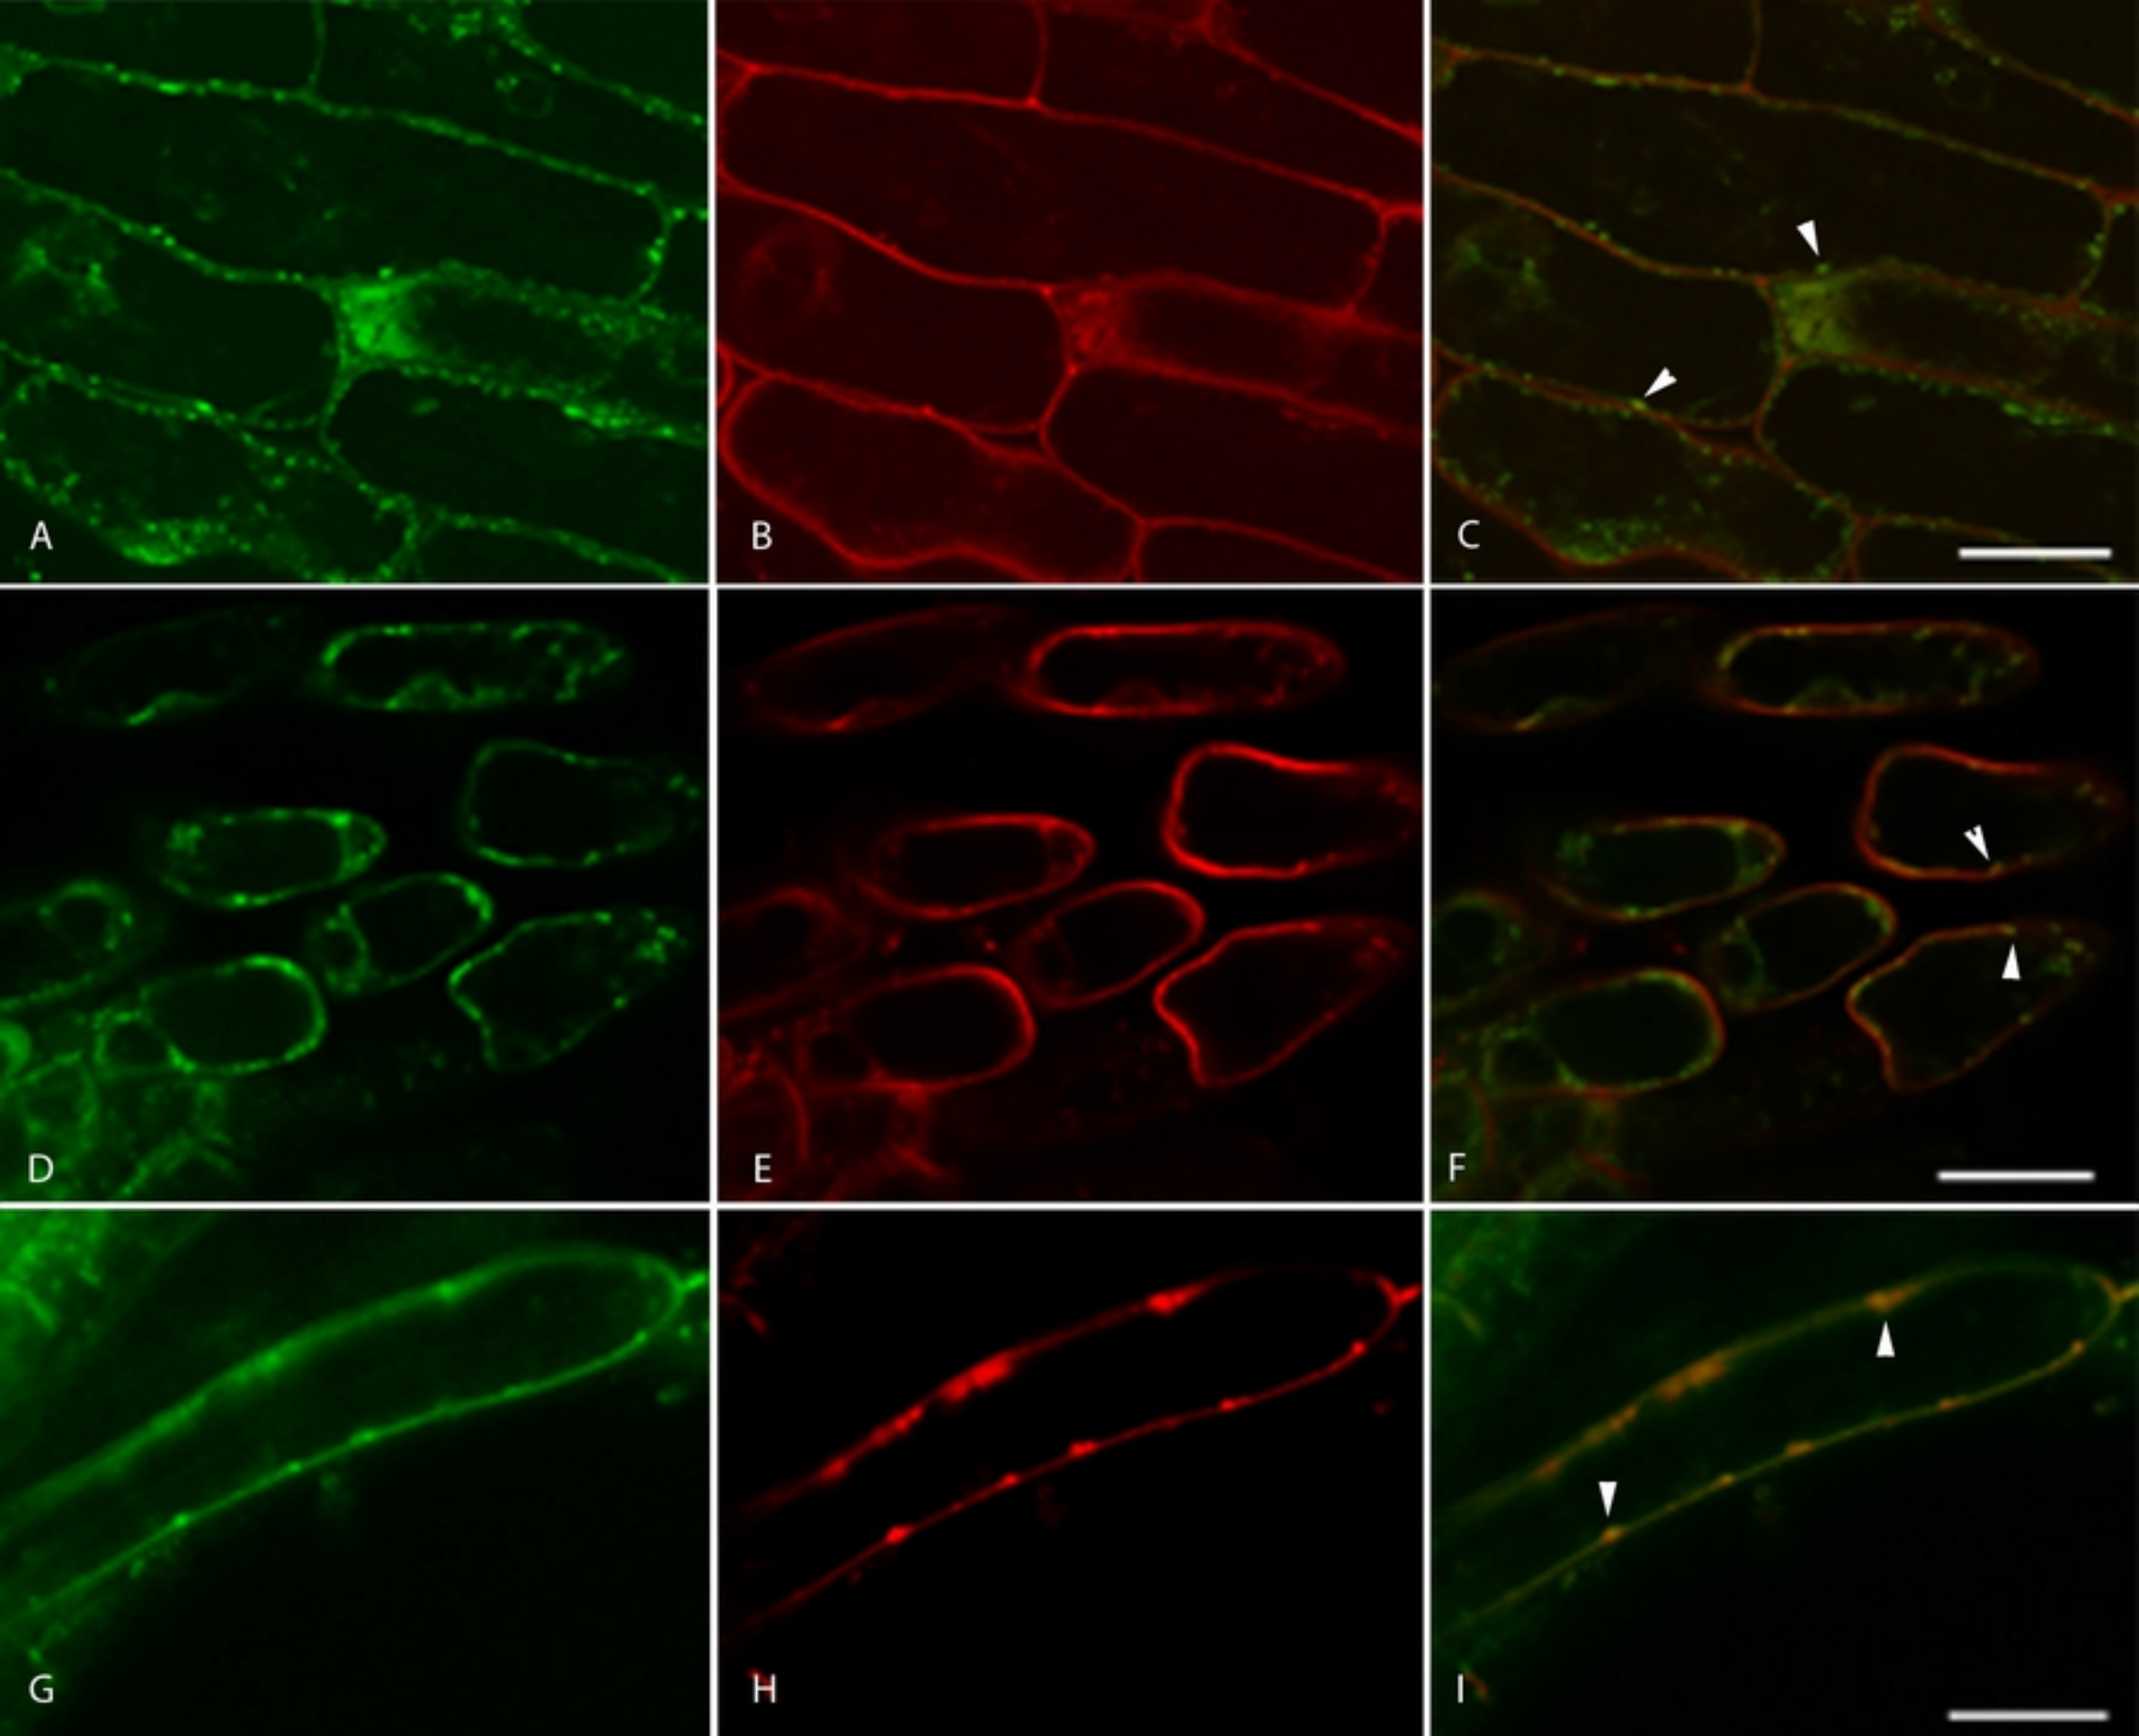

Figure4



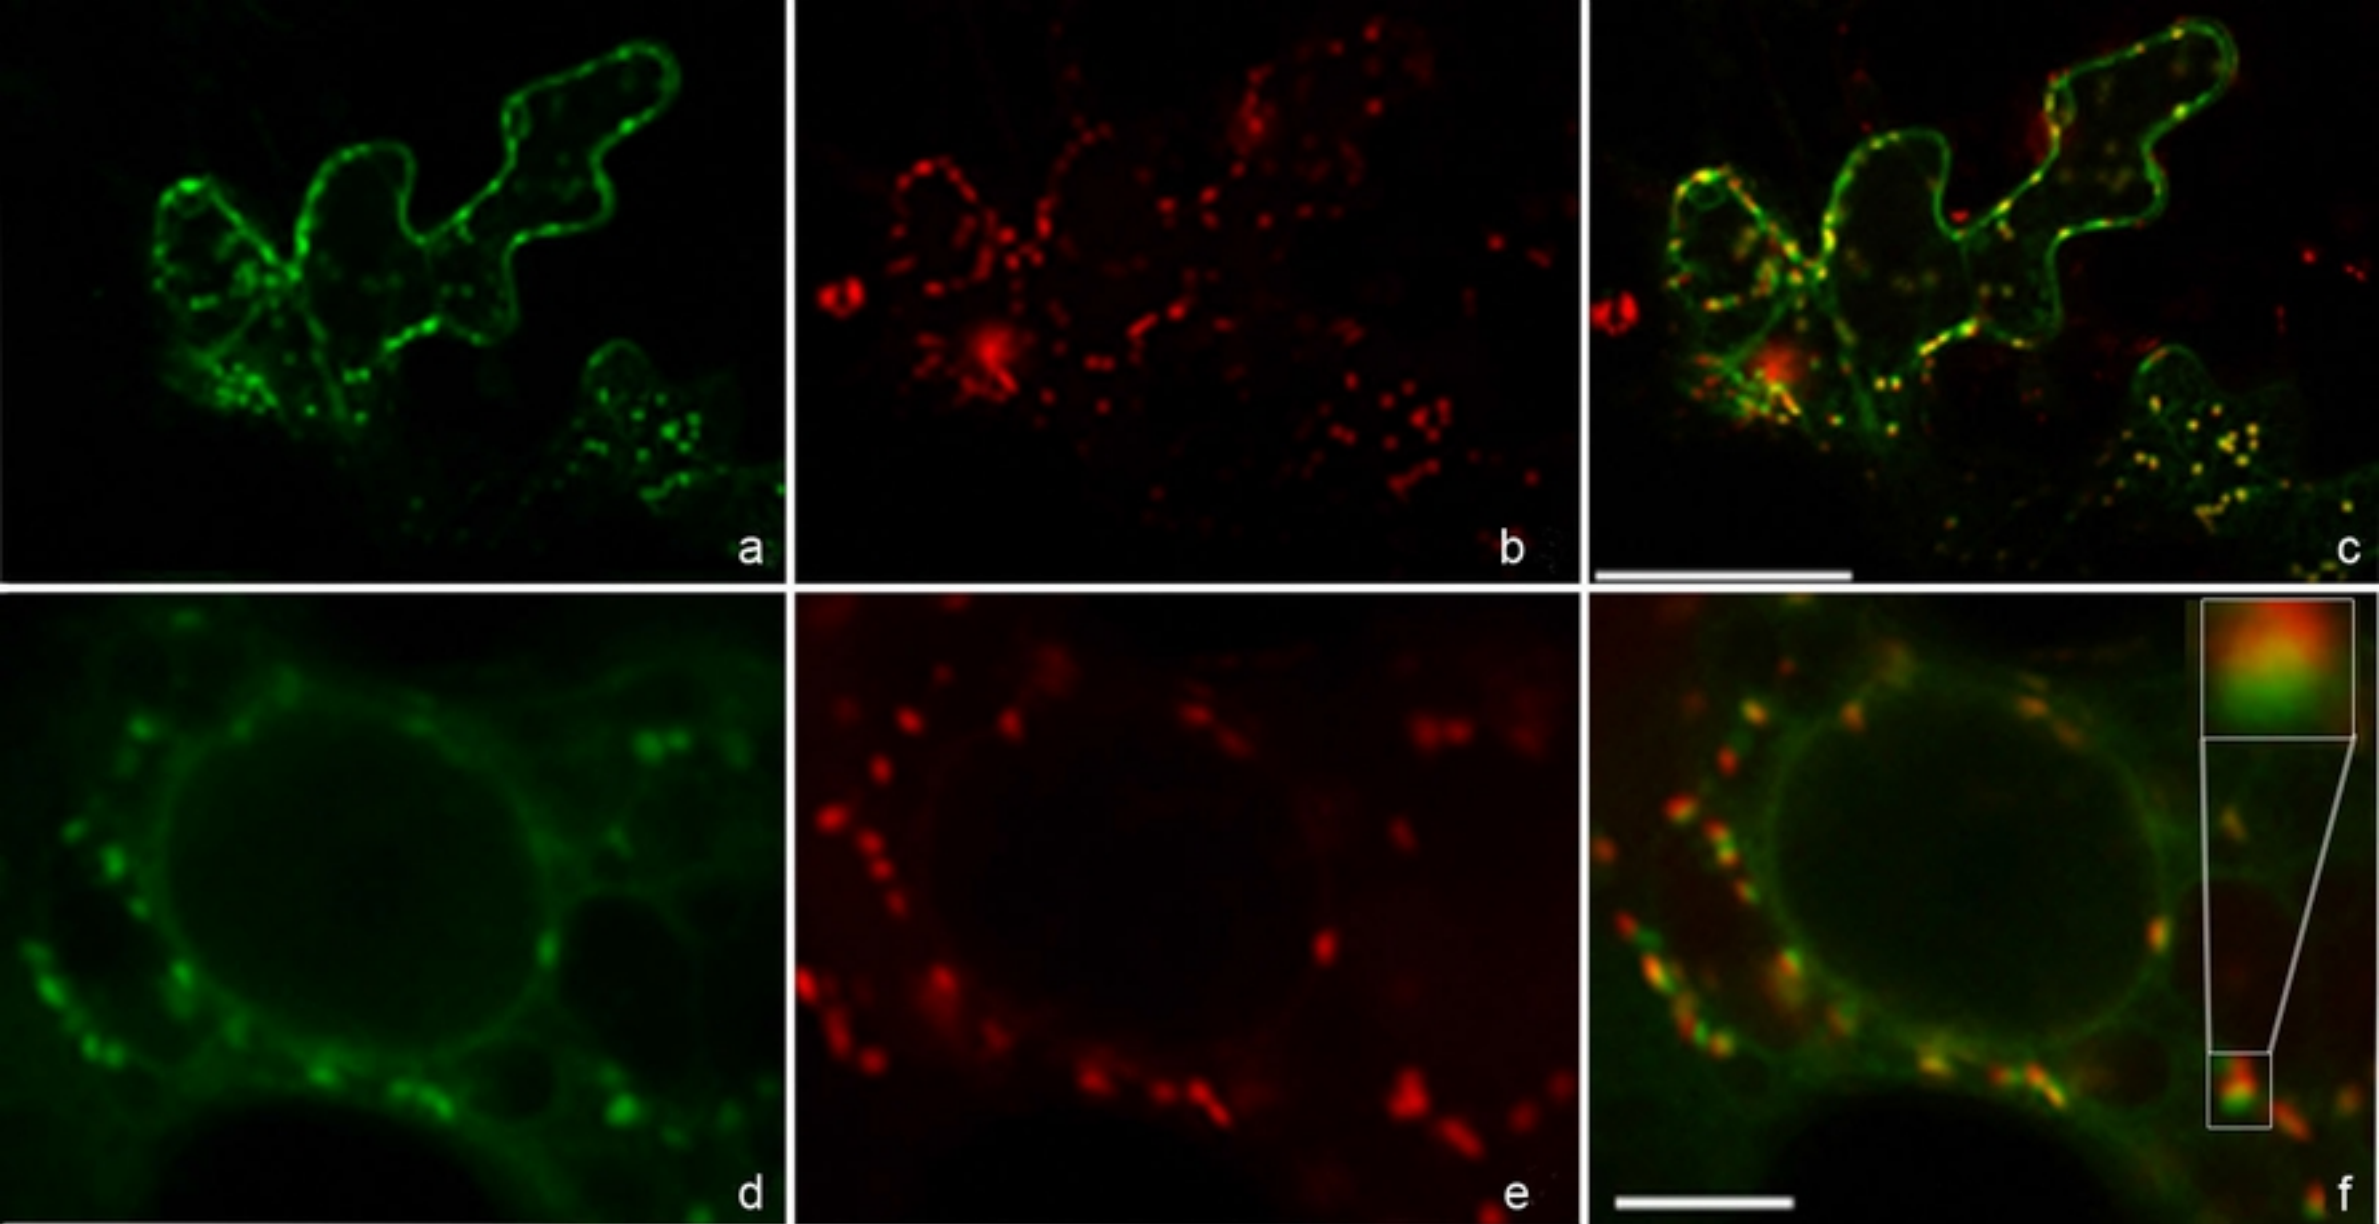

Figure 5



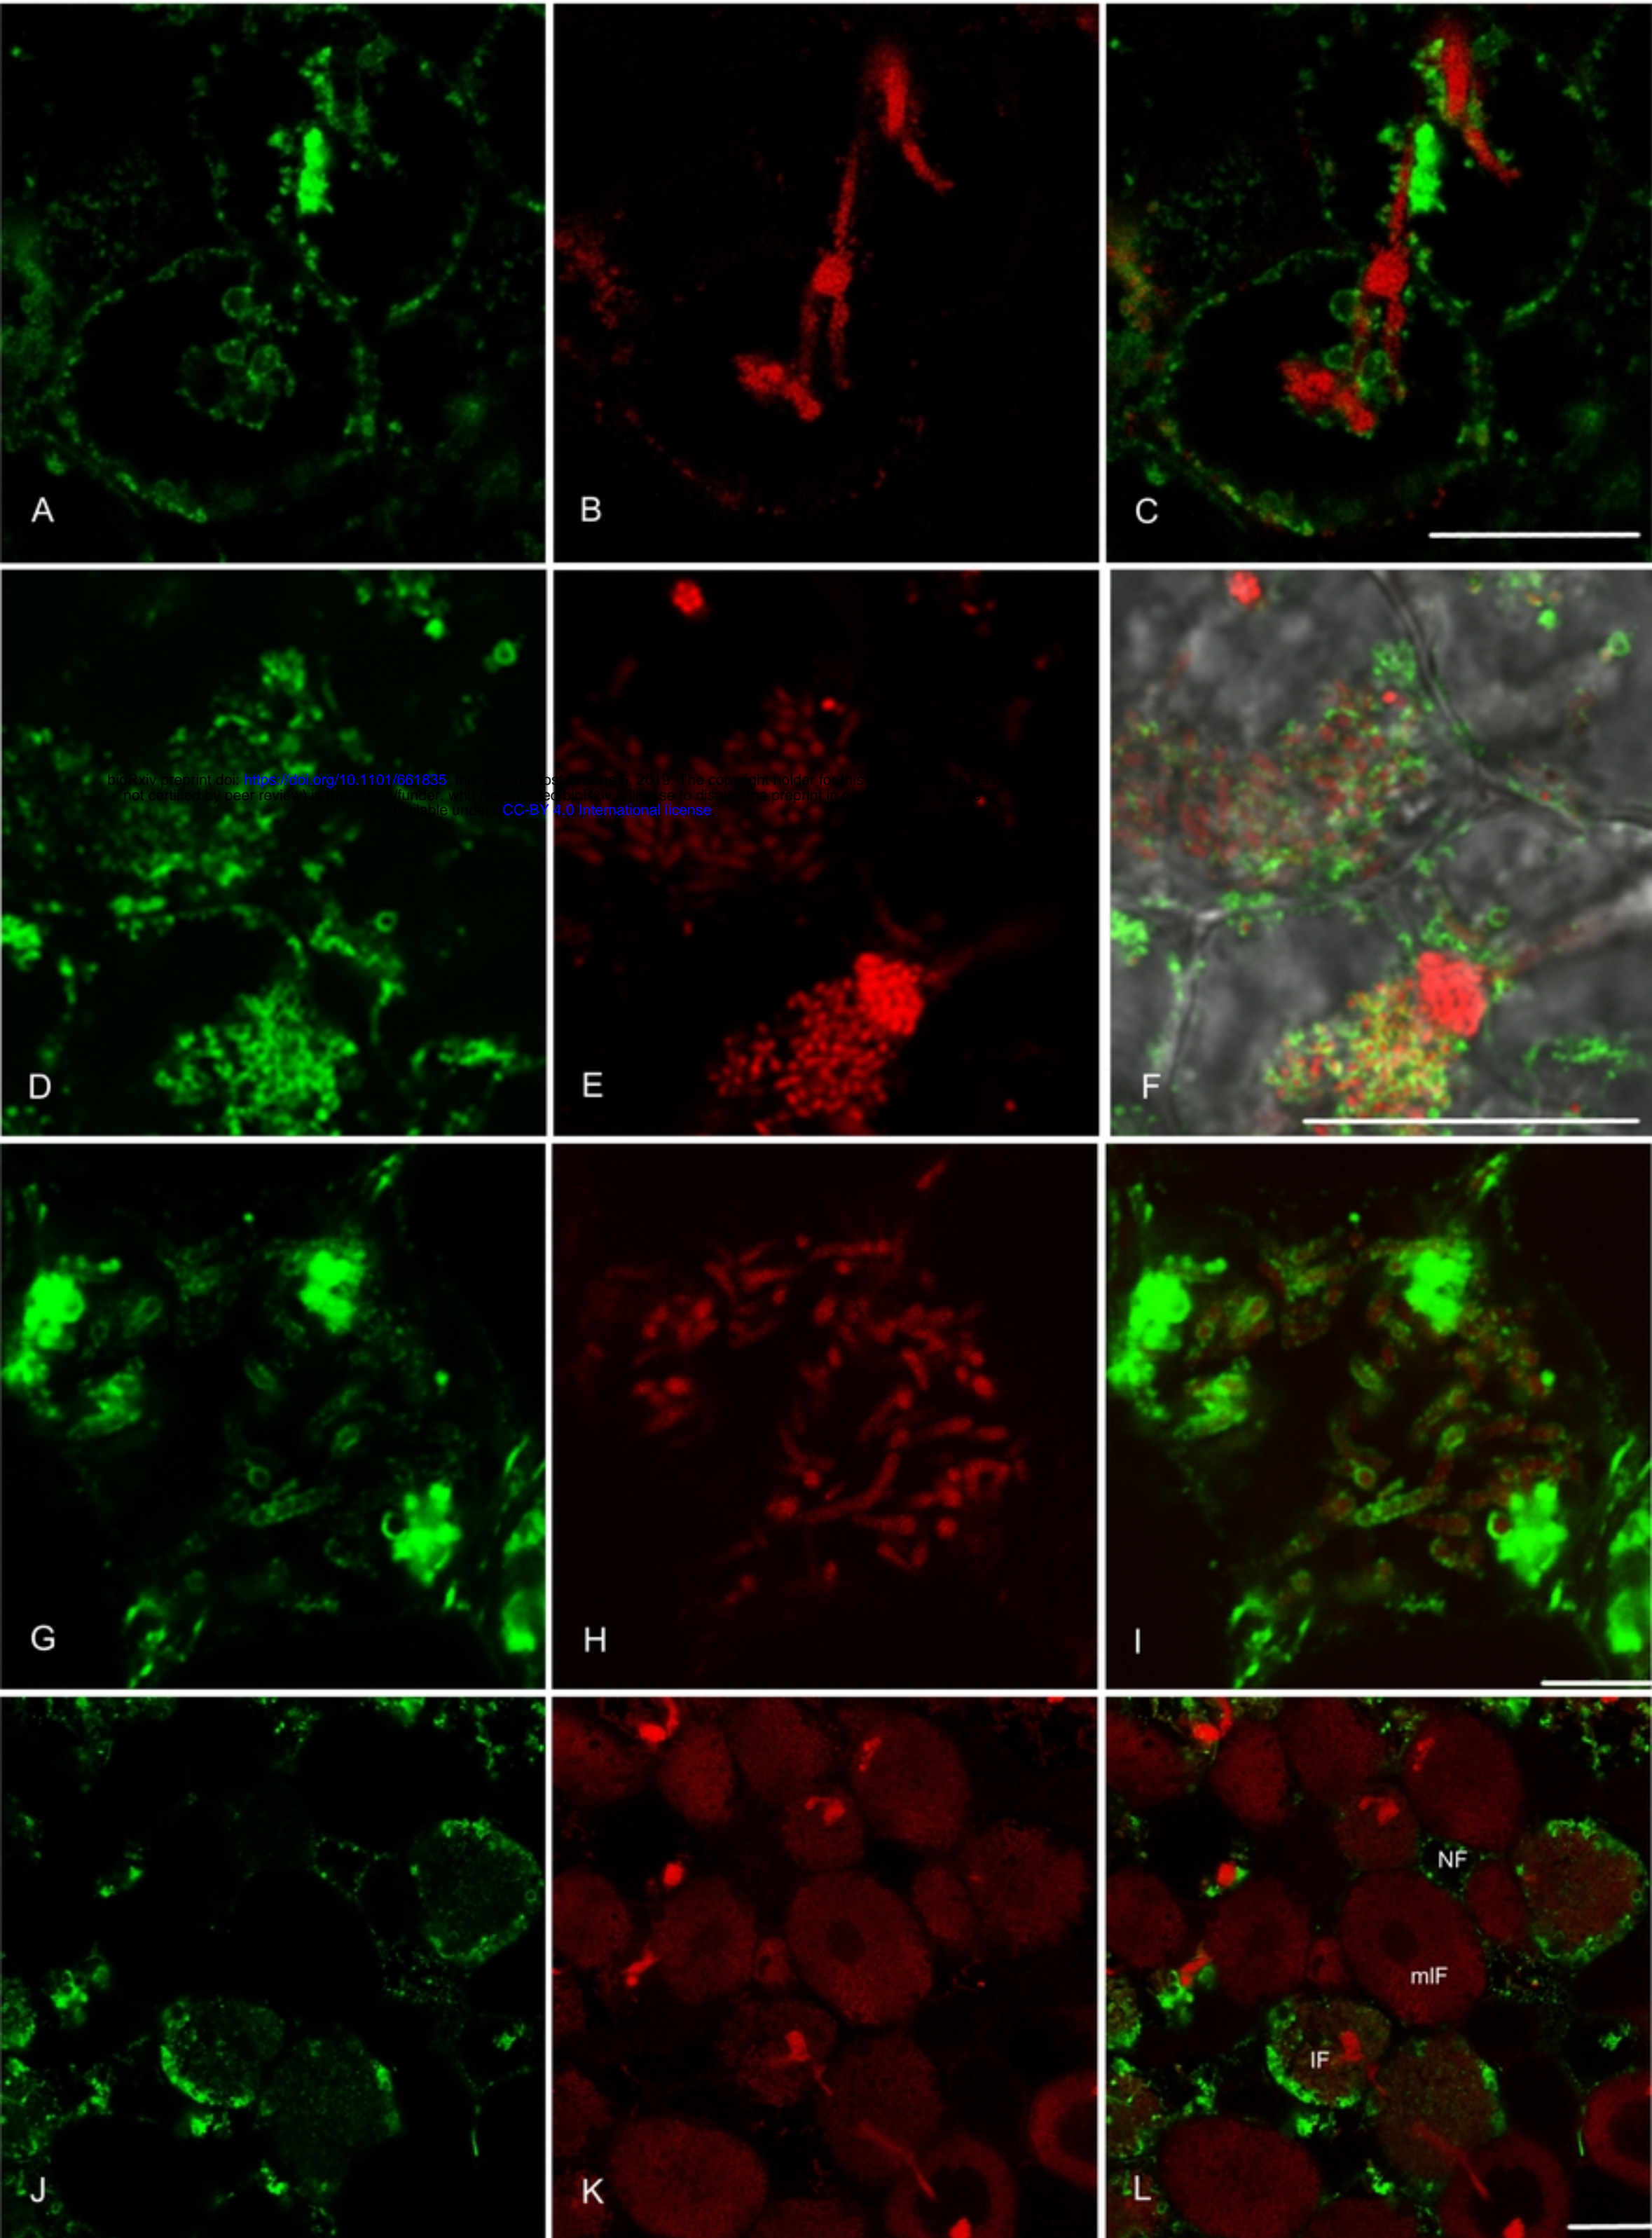

Figure6
